# Supplementary material for: Phenome-wide analyses establish a specific association between aortic valve PALMD expression and calcific aortic valve stenosis
Source: PubMed Central journal article supplement (PMC7455695; doi:10.1038/s42003-020-01210-x), 2020-08-28
Supplement: 42003_2020_1210_MOESM1_ESM.pdf [file 42003_2020_1210_MOESM1_ESM.pdf]

## SUPPLEMENTARY INFORMATION

### **Phenome-wide analyses establish a specific association between aortic valve *PALMD* expression and calcific aortic valve stenosis**

**Supplementary Figure 1.** Phenome-wide association study of rs6702619-G in the UK Biobank

**Supplementary Figure 2.** Phenome-wide association studies of *PALMD* genetically-determined expression in 8 tissues in the UK Biobank

**Supplementary Figure 3:** Relationship between *PALMD* eQTL in 8 tissues and GWAS association with CAVS

**Supplementary Figure 4.** Relationship between *PALMD* eQTL in selected tissues and GWAS association with Atrial fibrillation

**Supplementary Table 1.** Association between *PALMD* genetically-determined expression in the aortic valve and CAVS in the UK Biobank and QUEBEC-CAVS

**Supplementary Table 2.** Description of the public GWAS meta-analysis consortia of cardiovascular traits used to evaluate the impact of *PALMD* predicted expression in various tissues

**Supplementary Figures**

**Supplementary Figure 1.** Phenome-wide association study of rs6702619-G in the UK Biobank

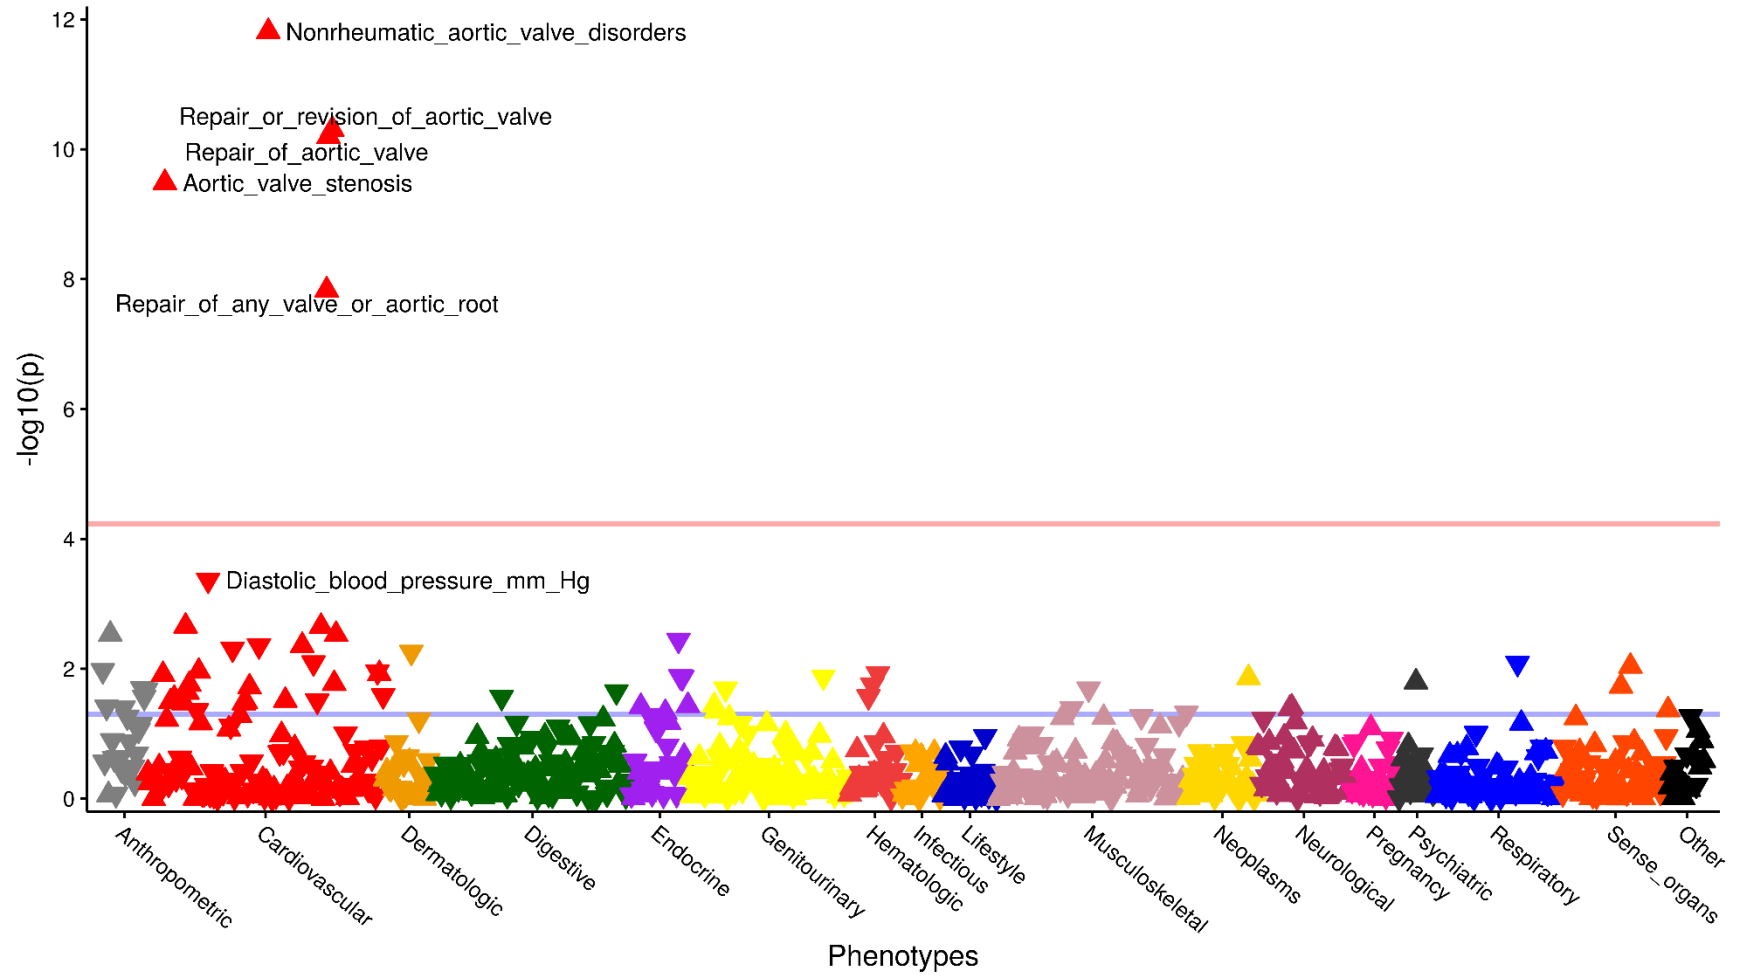

Each triangle represents a different phenotype ( $n=852$ ). Triangles pointing up and down are positive and negative associations with rs6702619-G, respectively. The pink horizontal line represents the threshold for significance after correcting for multiple testing ( $P=0.05/852=5.9\times 10^{-5}$ ). The blue horizontal line represents the threshold for nominal significance ( $P=0.05$ ).

**Supplementary Figure 2.** Phenome-wide association studies of *PALMD* genetically-determined expression in 8 tissues in the UK Biobank

**A) Brain anterior cingulate cortex**

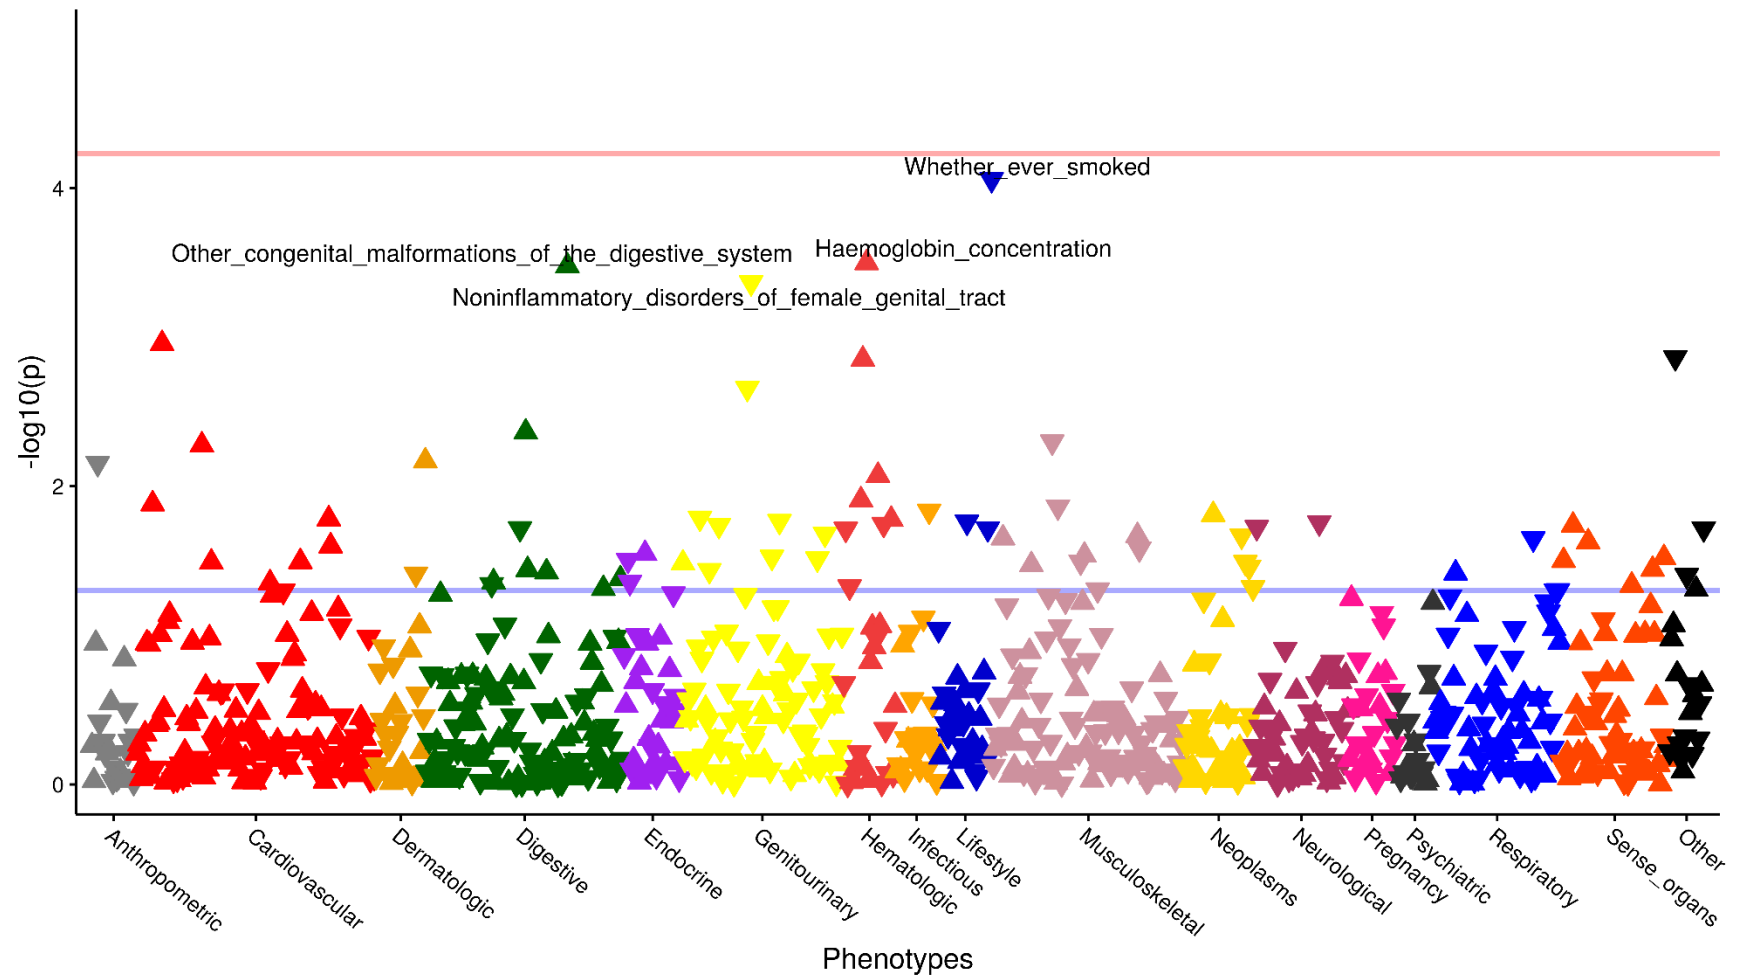

## B) Transformed fibroblasts

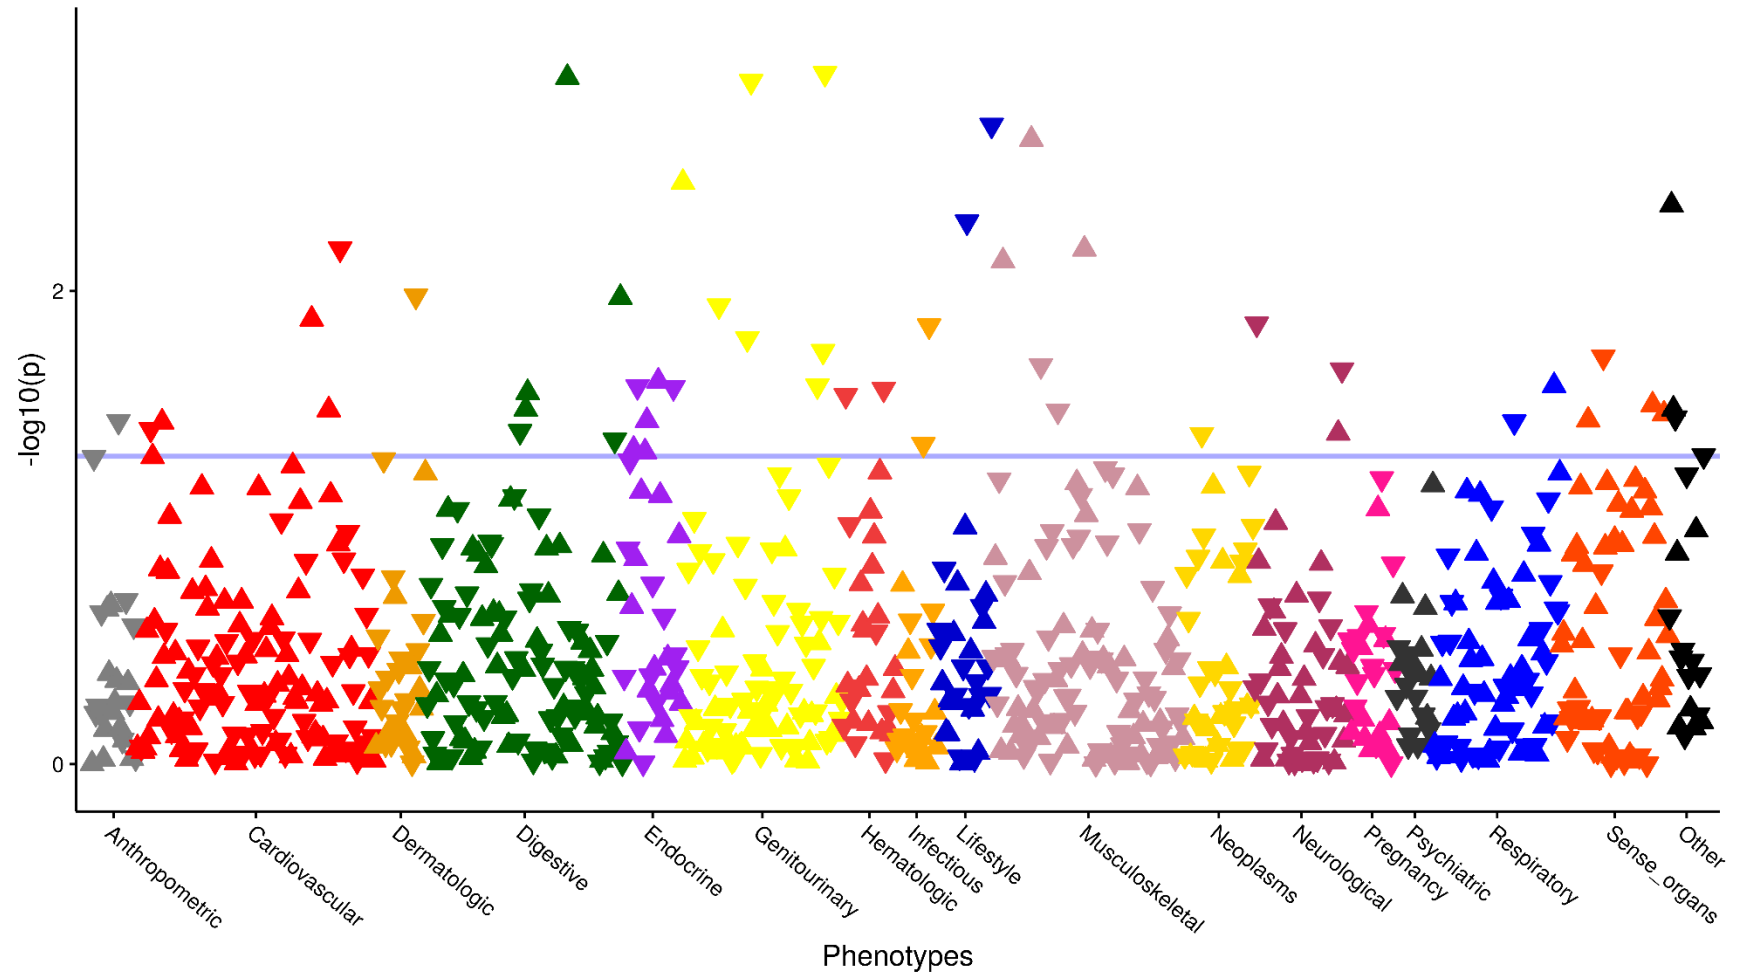

### C) Gastroesophageal junction

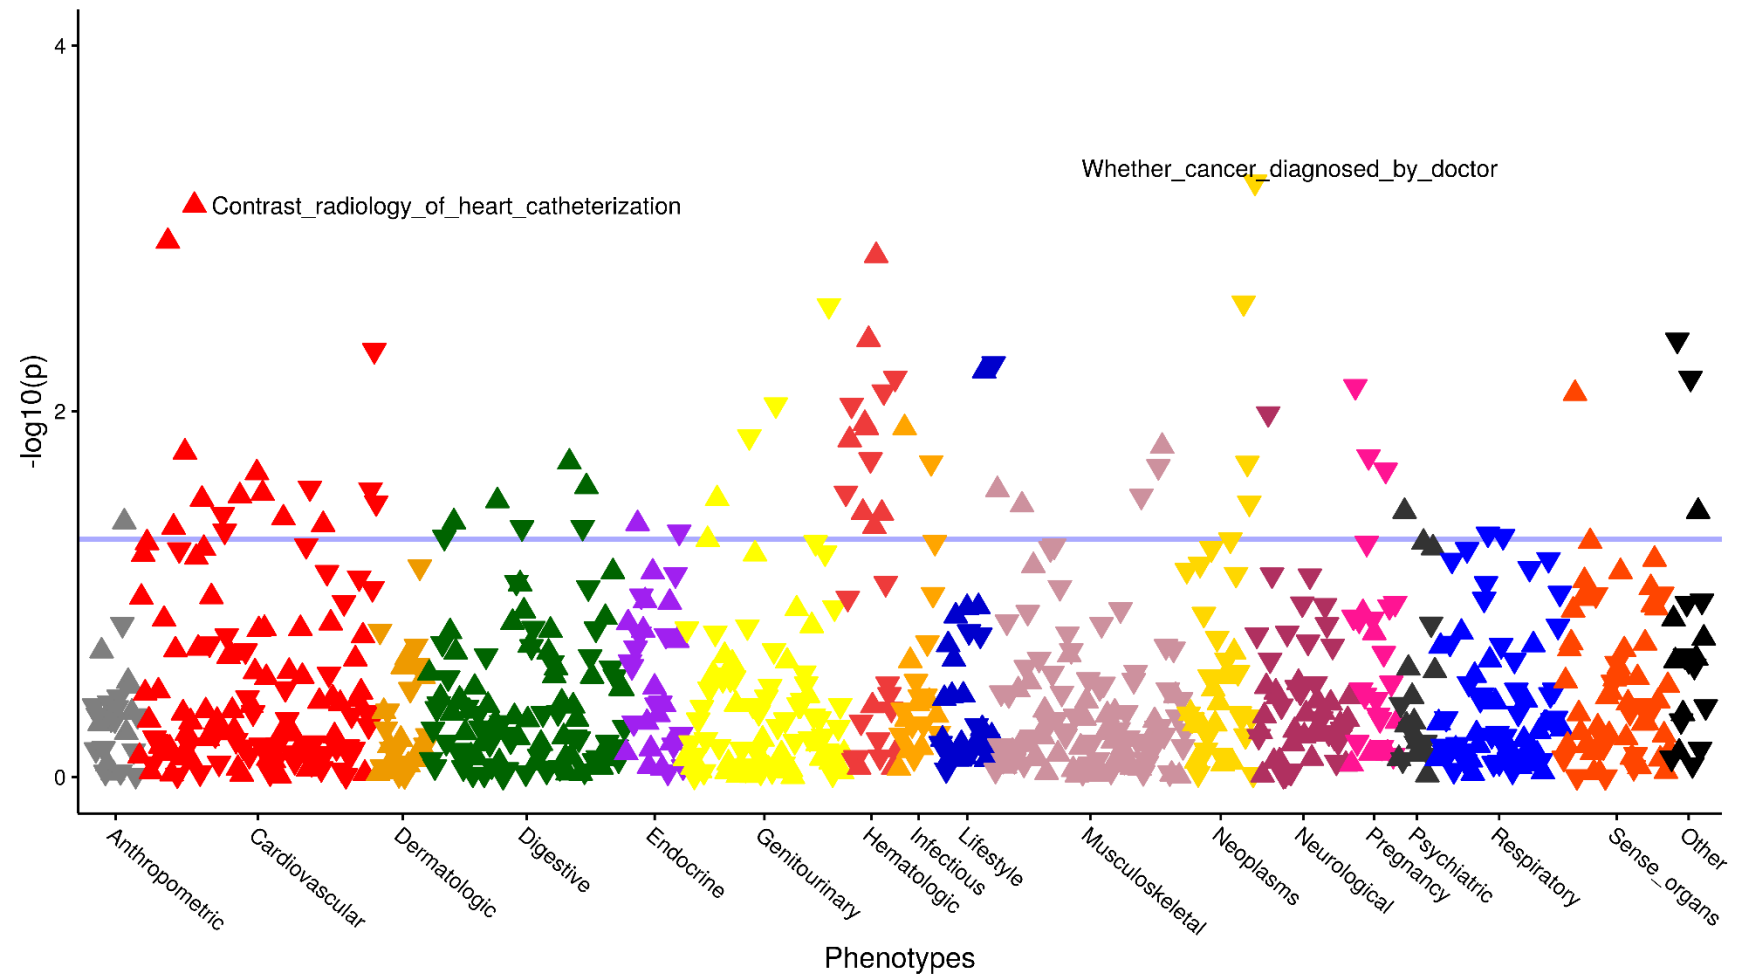

### D) Esophagus mucosa

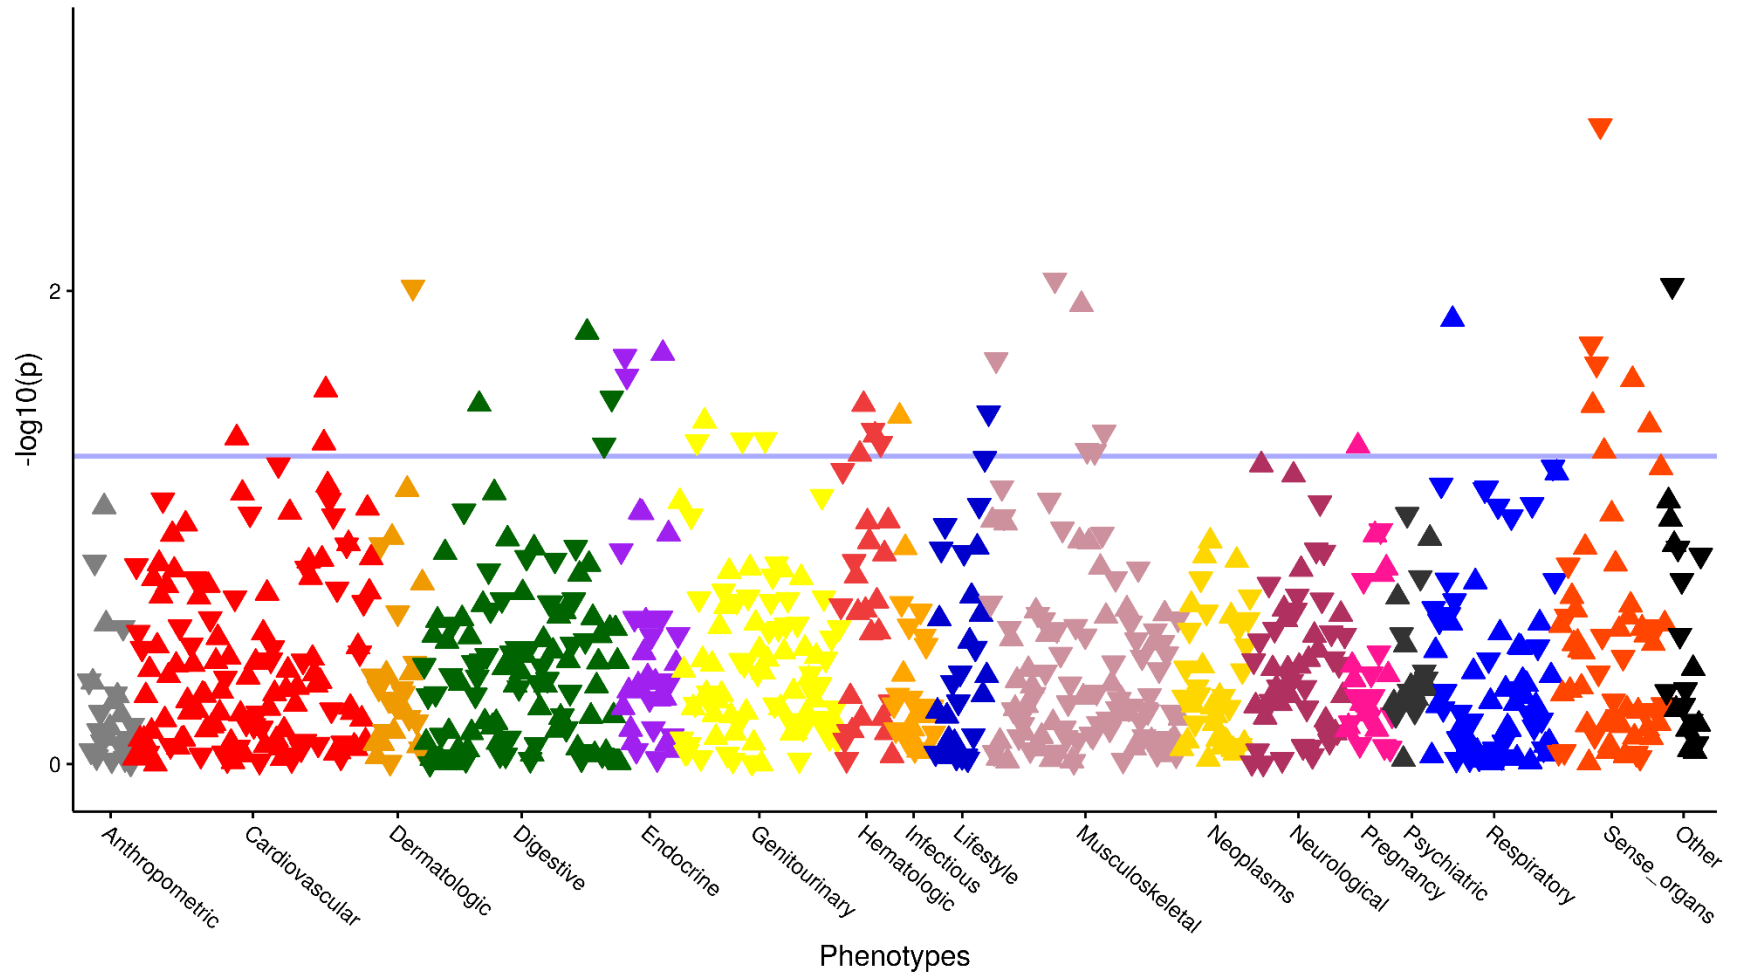

### E) Esophagus muscularis

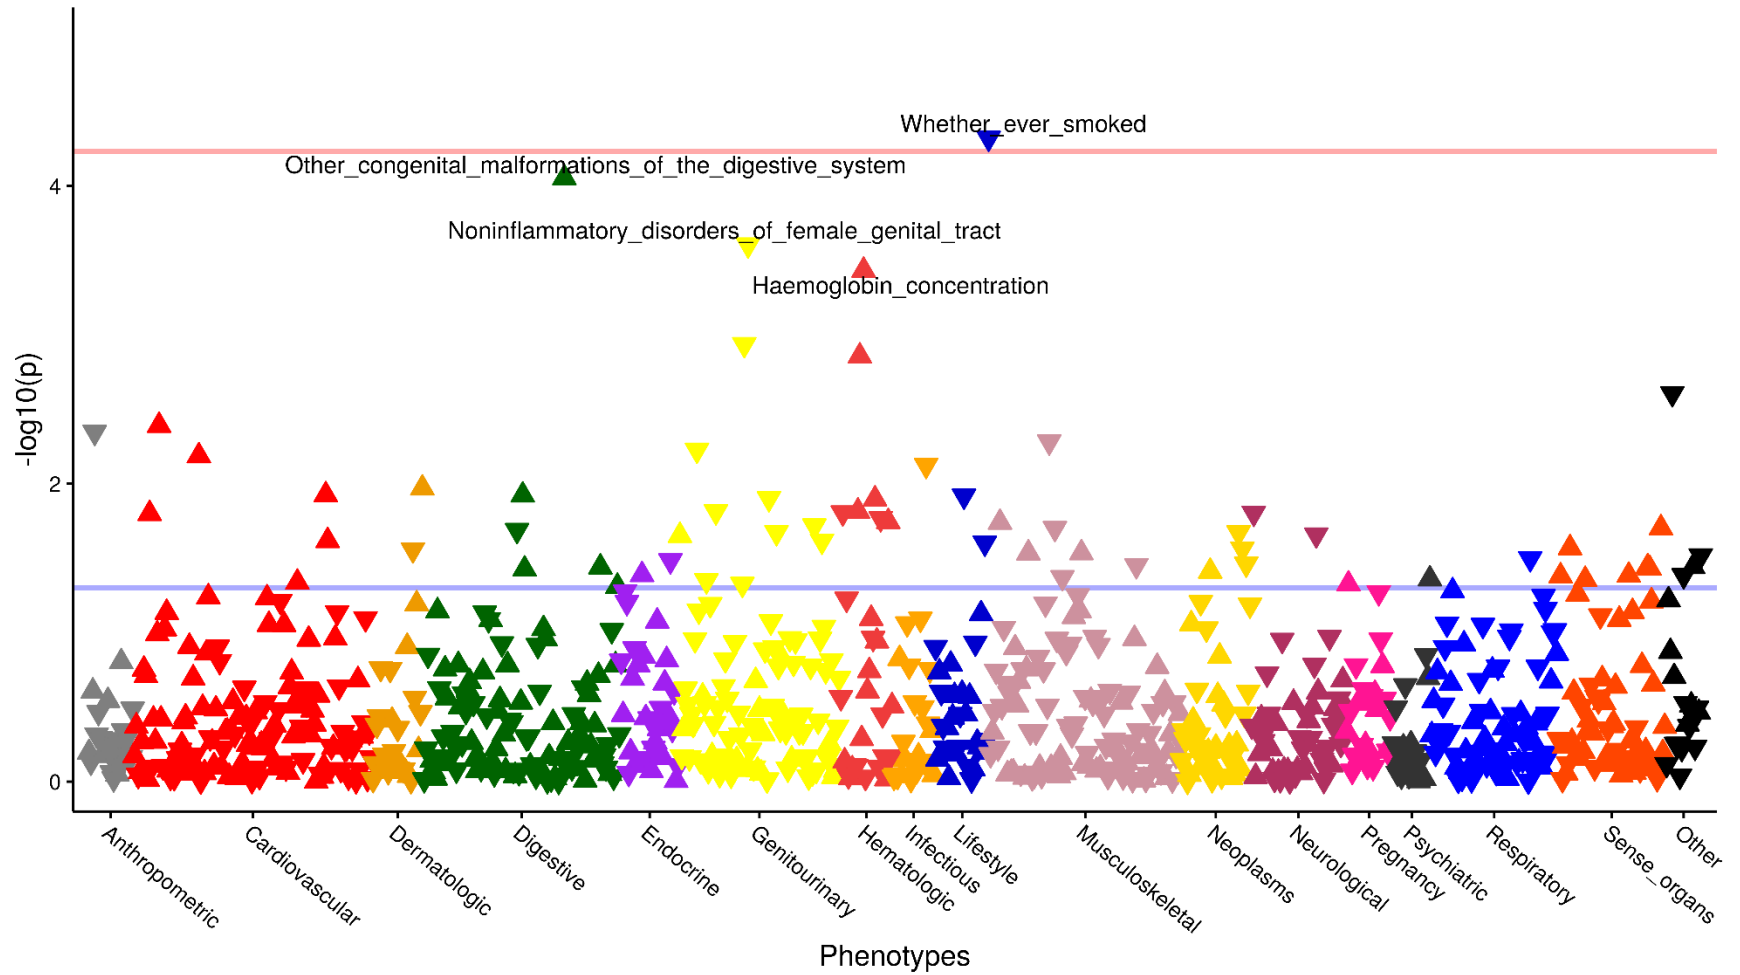



### F) Tibial nerve

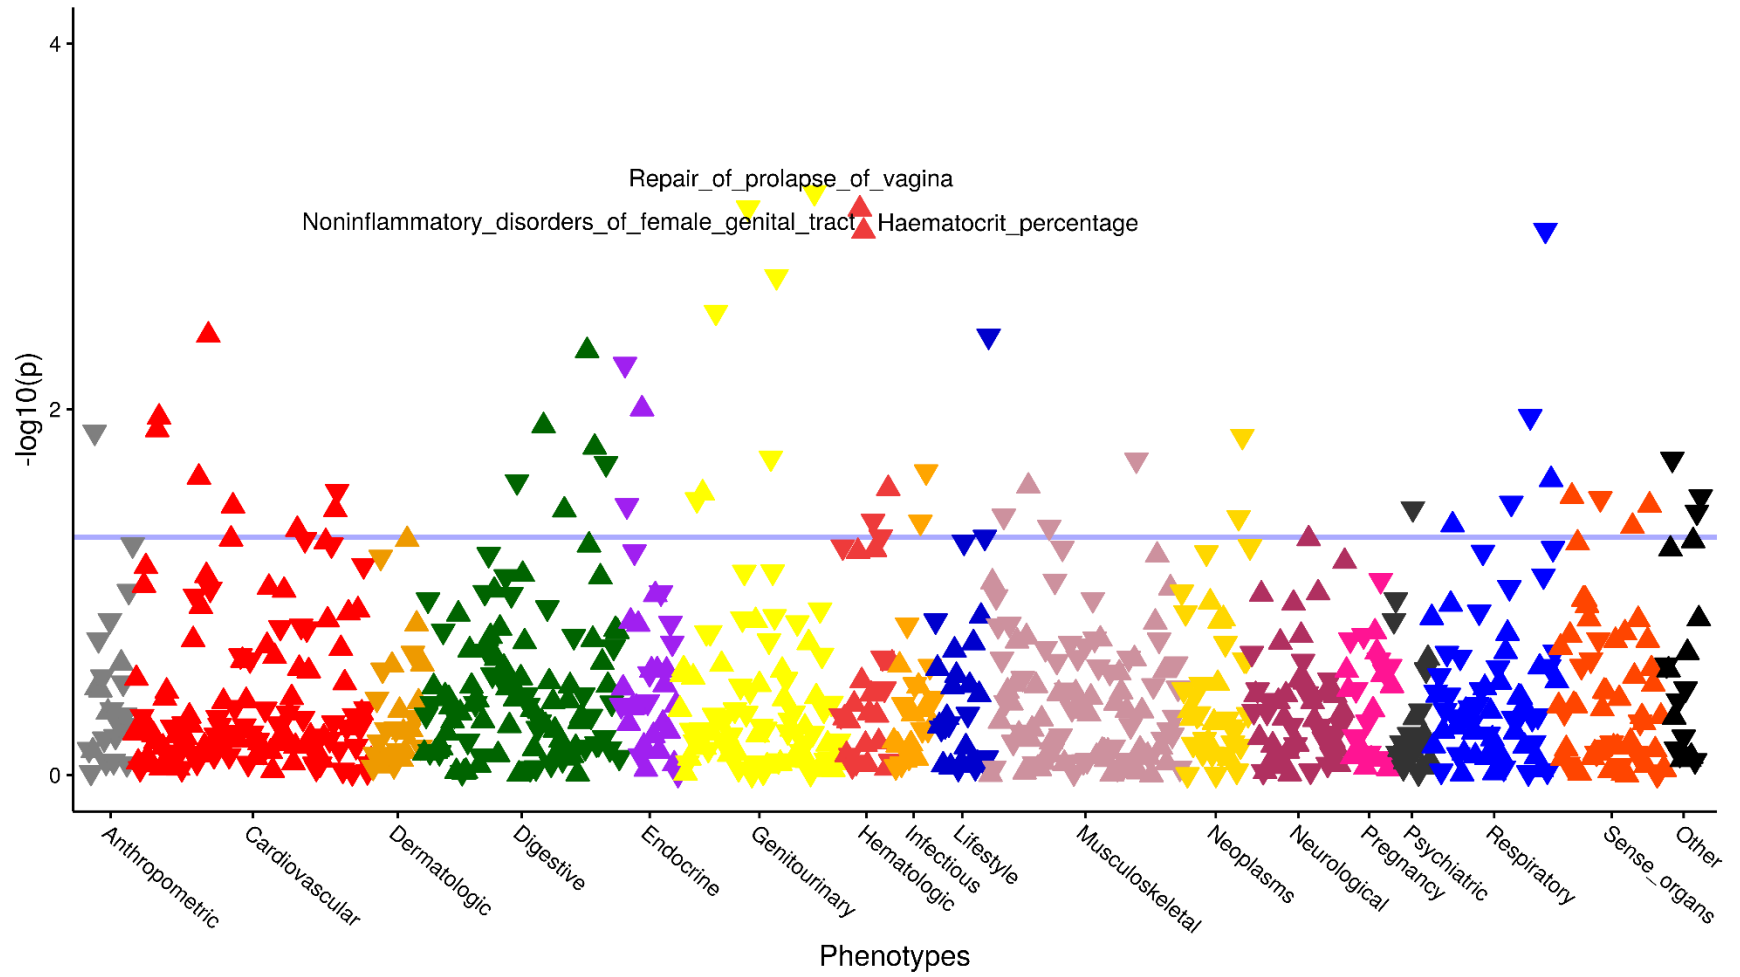

### G) Pancreas

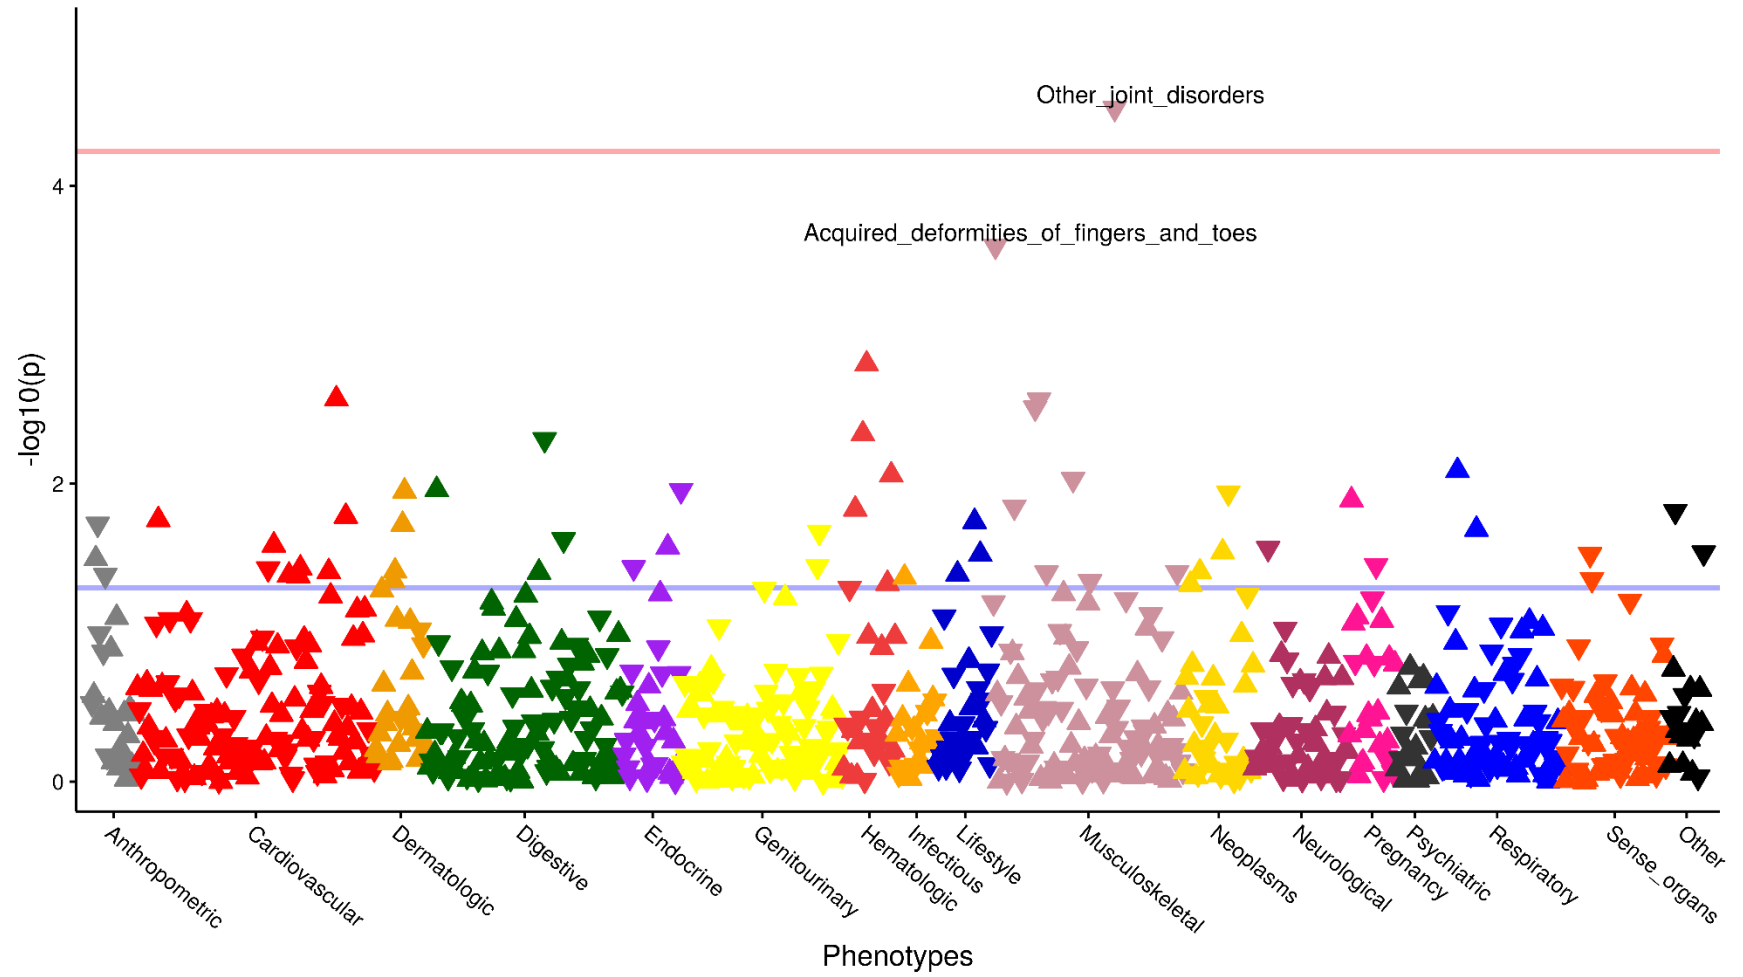

## H) Subcutaneous adipose tissue

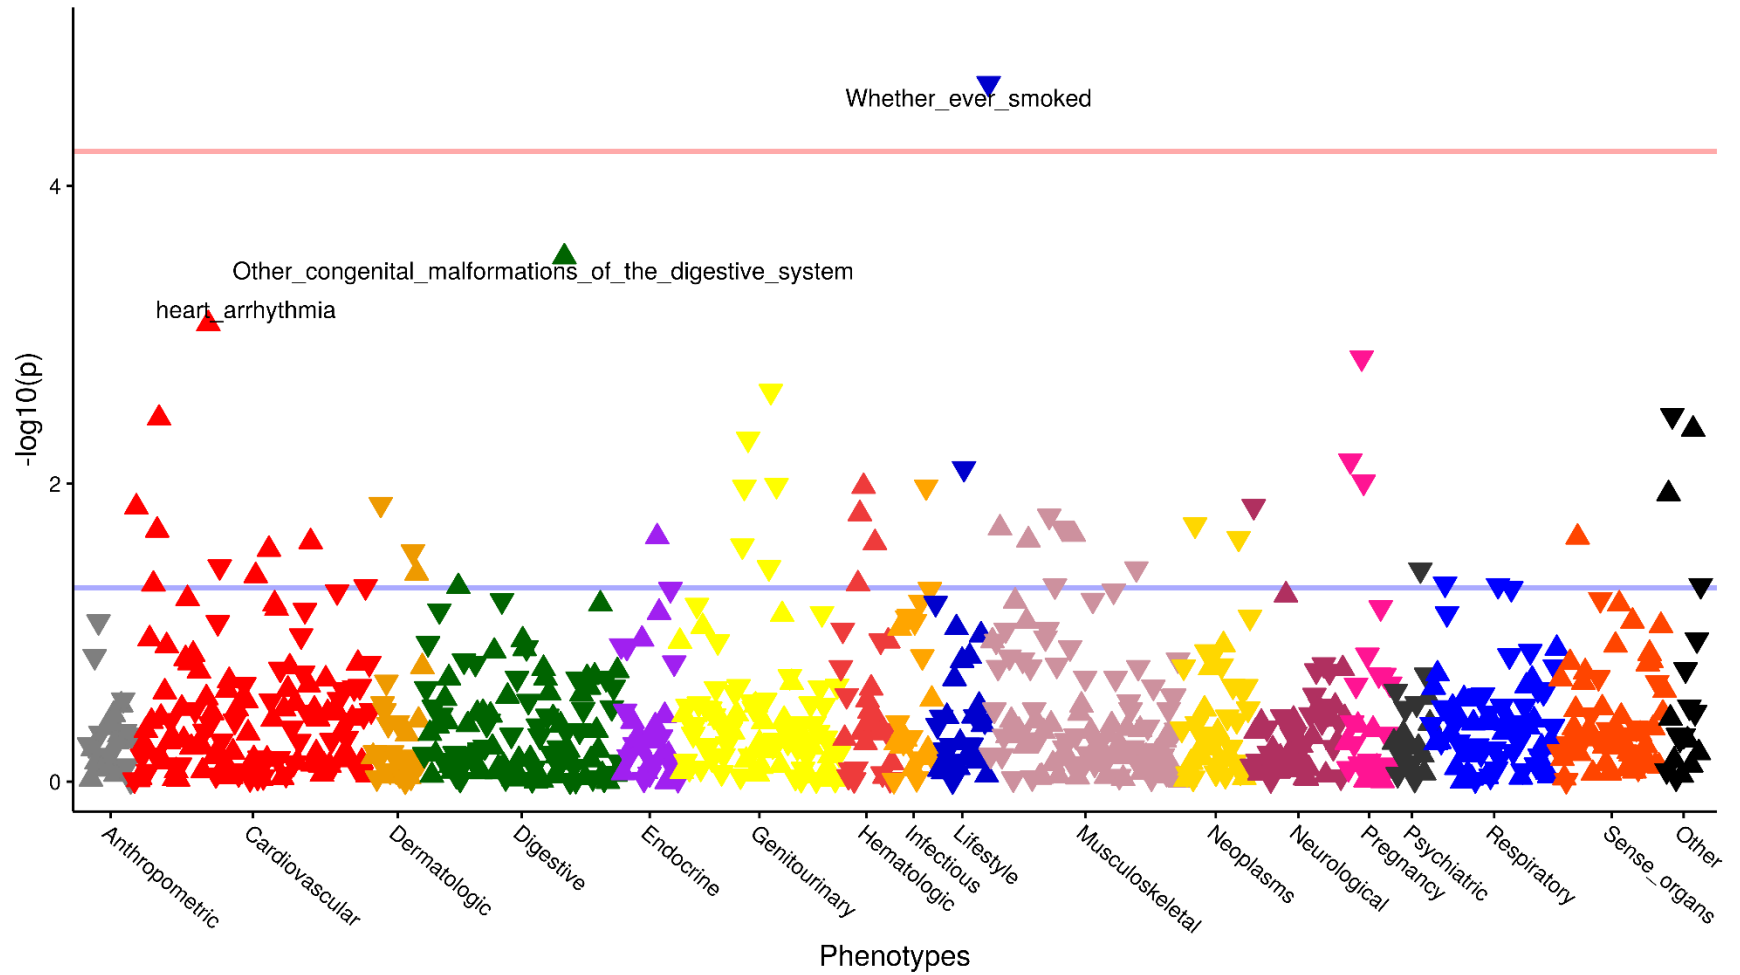

Phenome-wide association study of *PALMD* genetically-determined expression in **A** Brain anterior cingulate cortex; **B** Transformed fibroblasts; **C** Gastroesophageal junction; **D** Esophagus mucosa; **E** Esophagus muscularis; **F** Tibial nerve; **G** Pancreas; **H** Subcutaneous adipose tissue. Each triangle represents a different phenotype (n=852). Triangles pointing up and down are positive and negative associations with *PALMD* genetically-determined expression in the respective tissue. The pink horizontal line represents  $P=0.05/852=5.9\times 10^{-5}$ . The blue horizontal line represents the threshold for nominal significance ( $P=0.05$ ).

Supplementary Figure 3. Relationship between *PALMD* eQTL in 8 tissues and GWAS association with CAVS

A) Brain anterior cingulate cortex

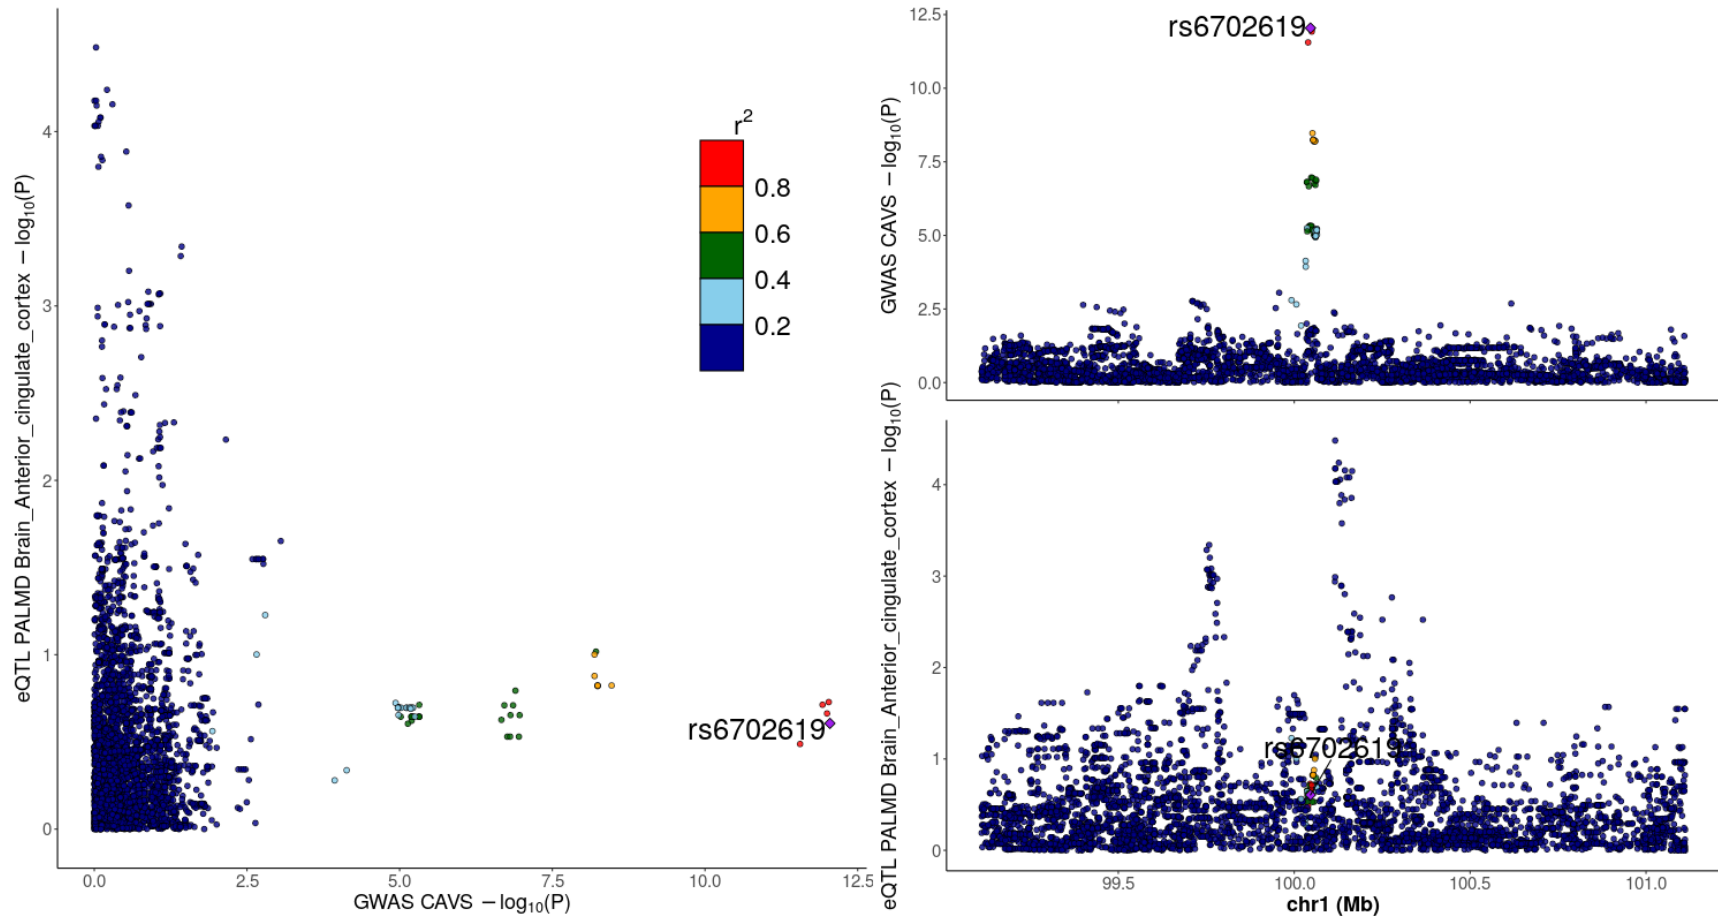

## B) Transformed fibroblasts

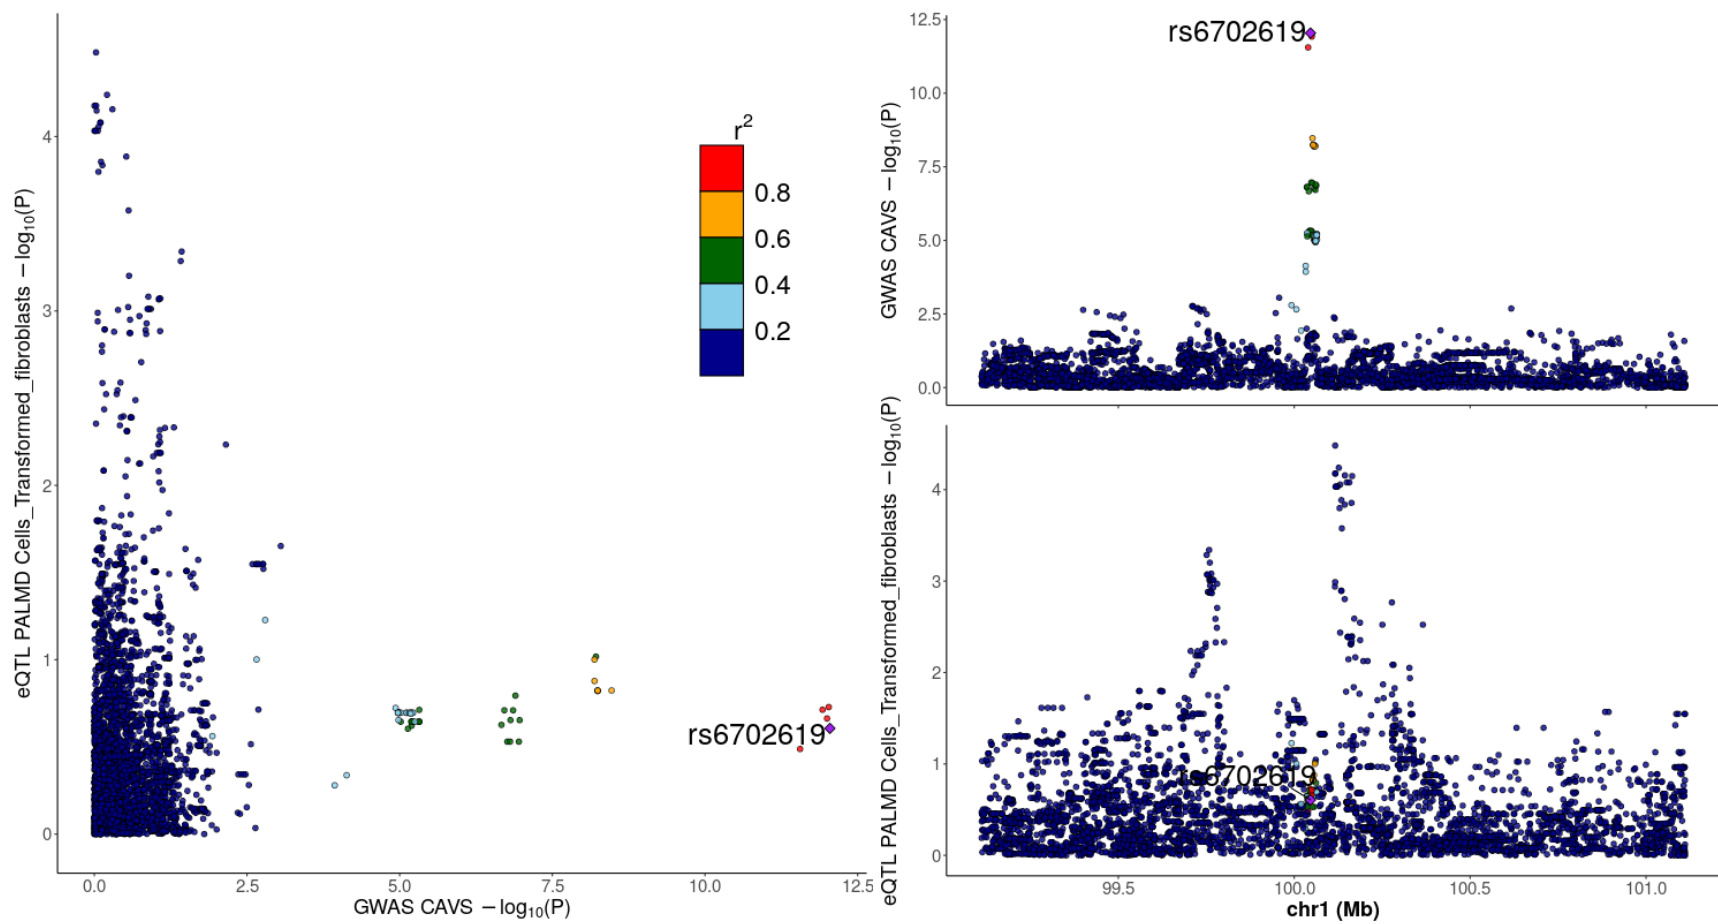

### C) Gastroesophageal junction

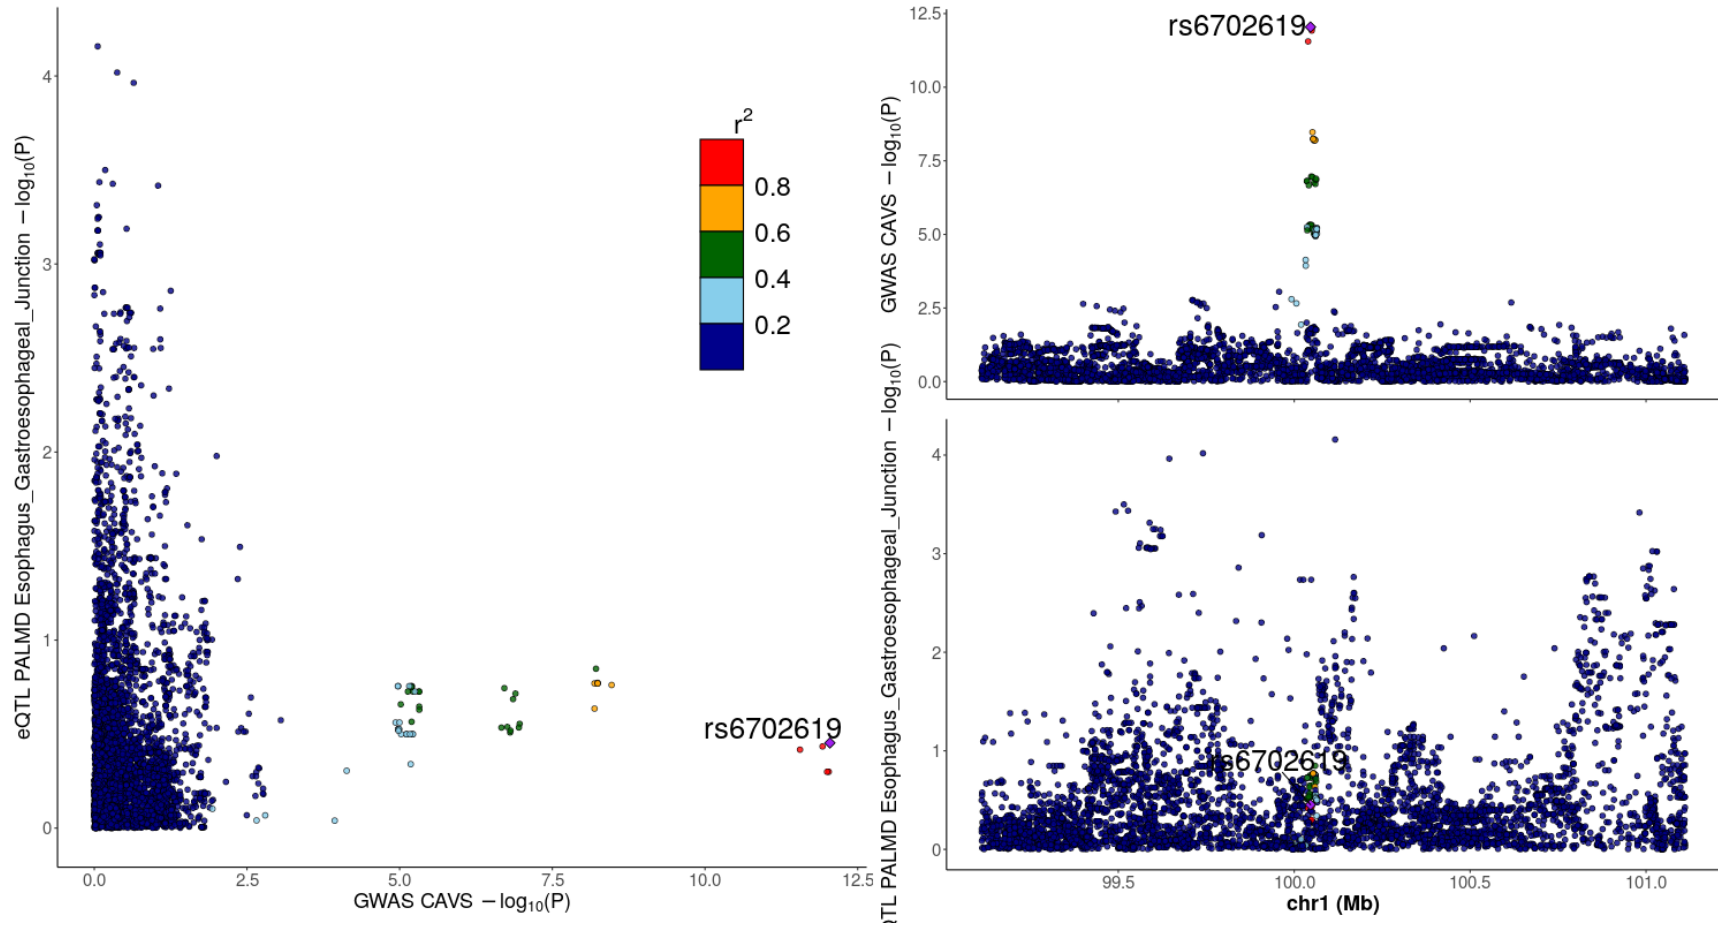

### D) Esophagus mucosa

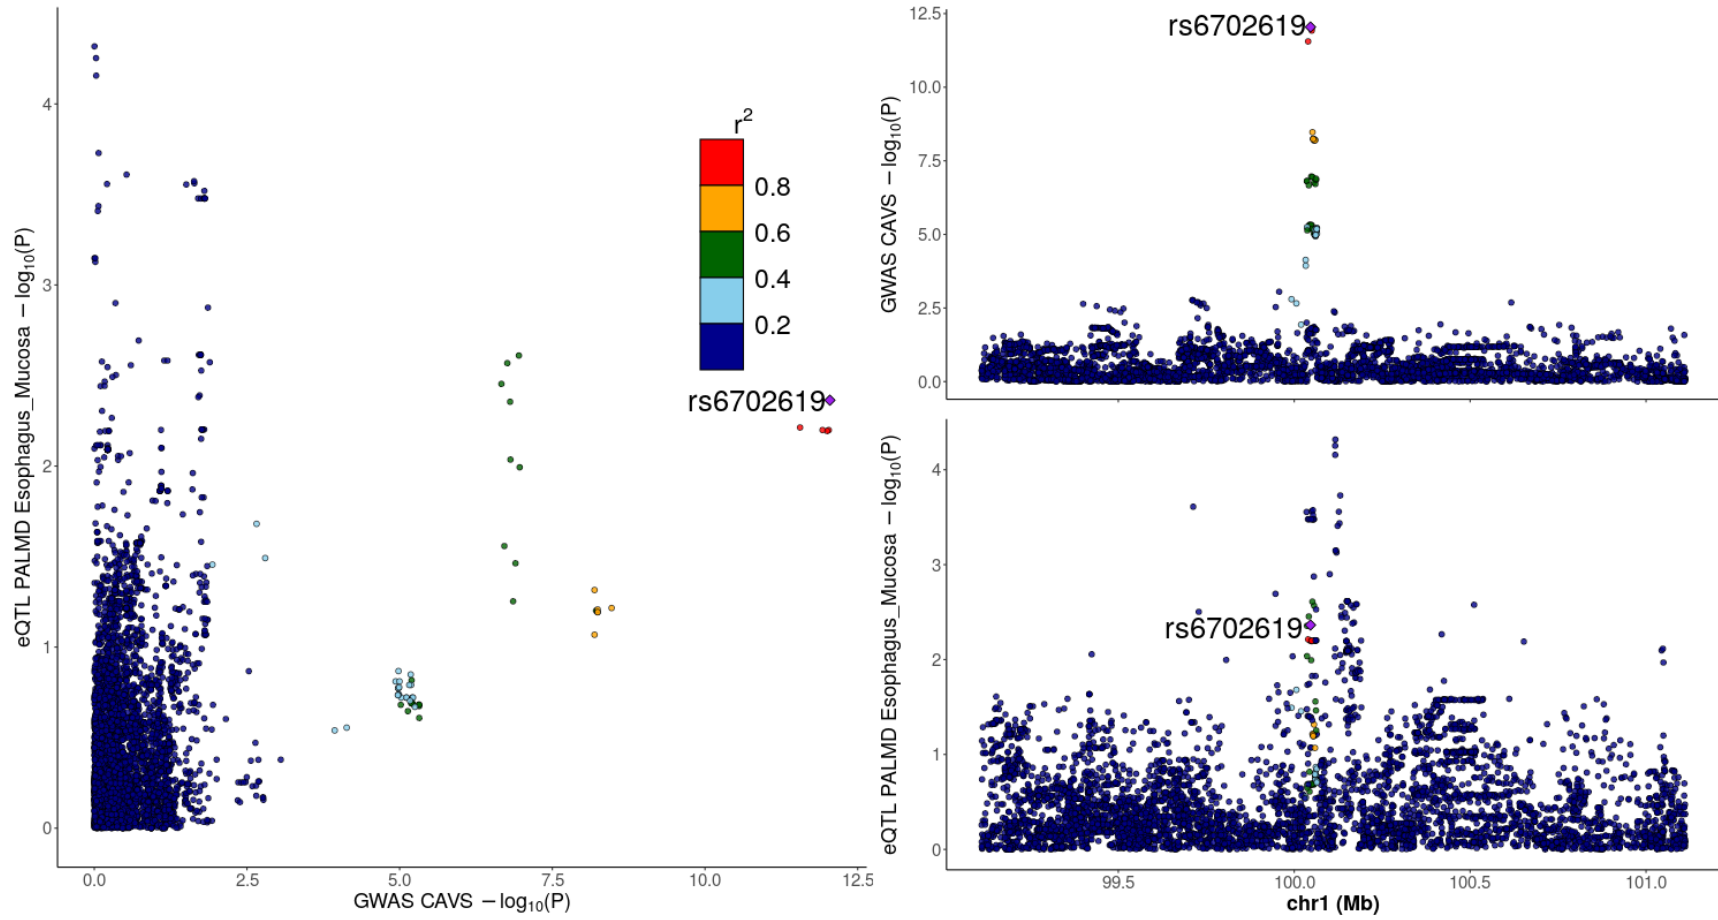



### E) Esophagus muscularis

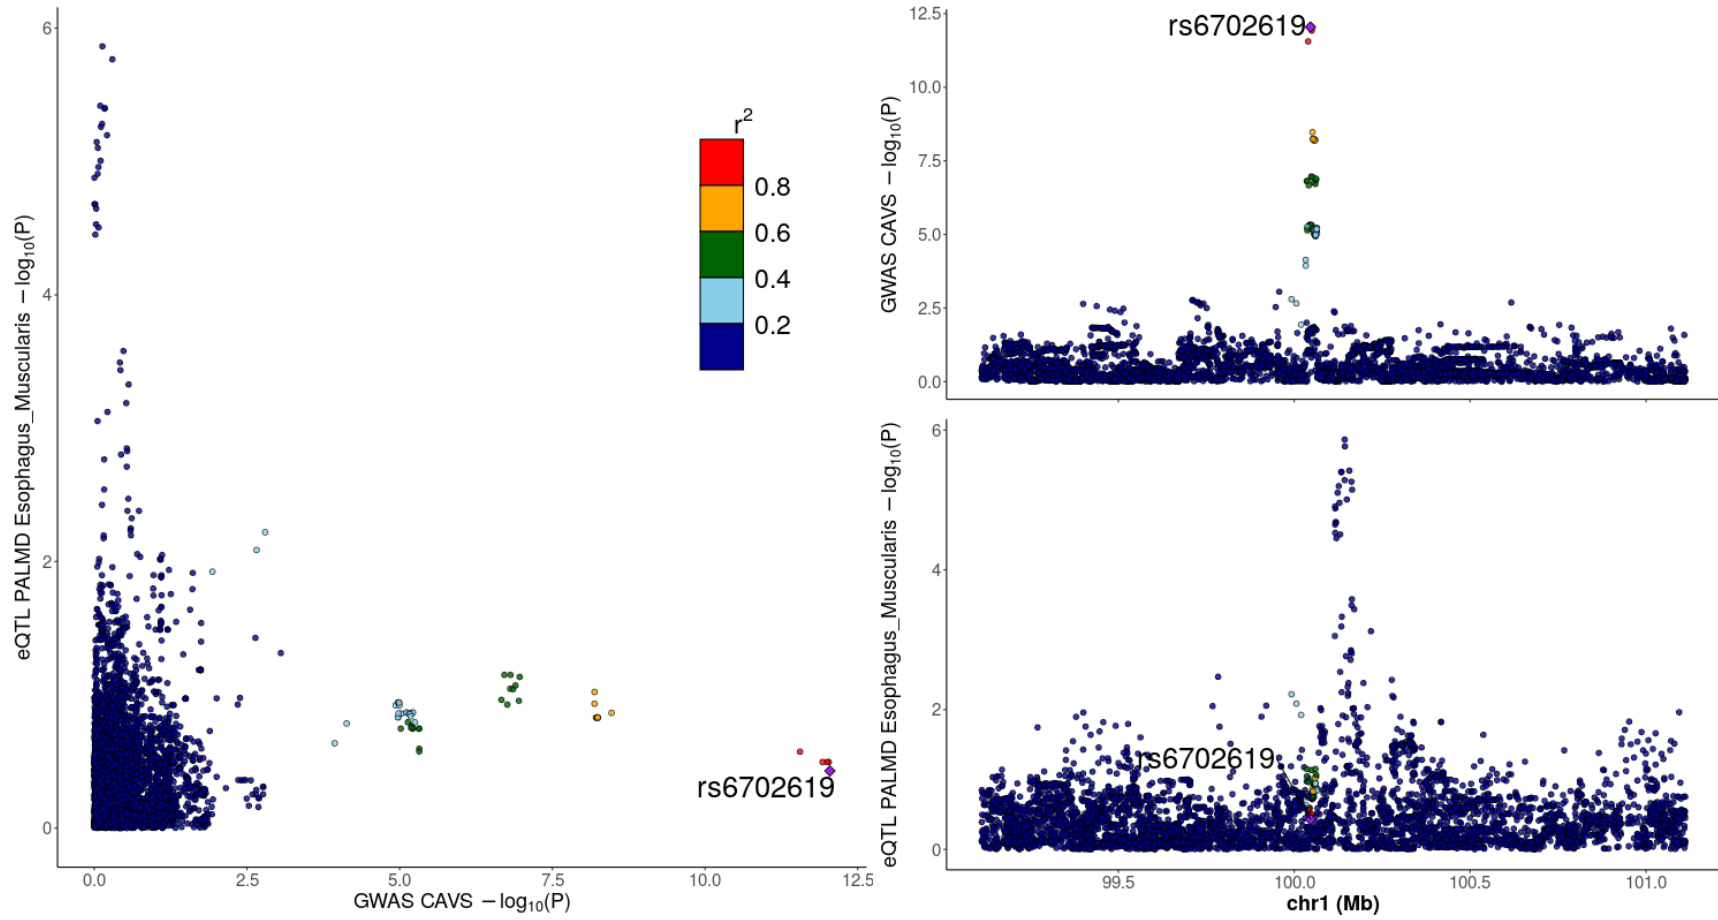

## F) Tibial nerve

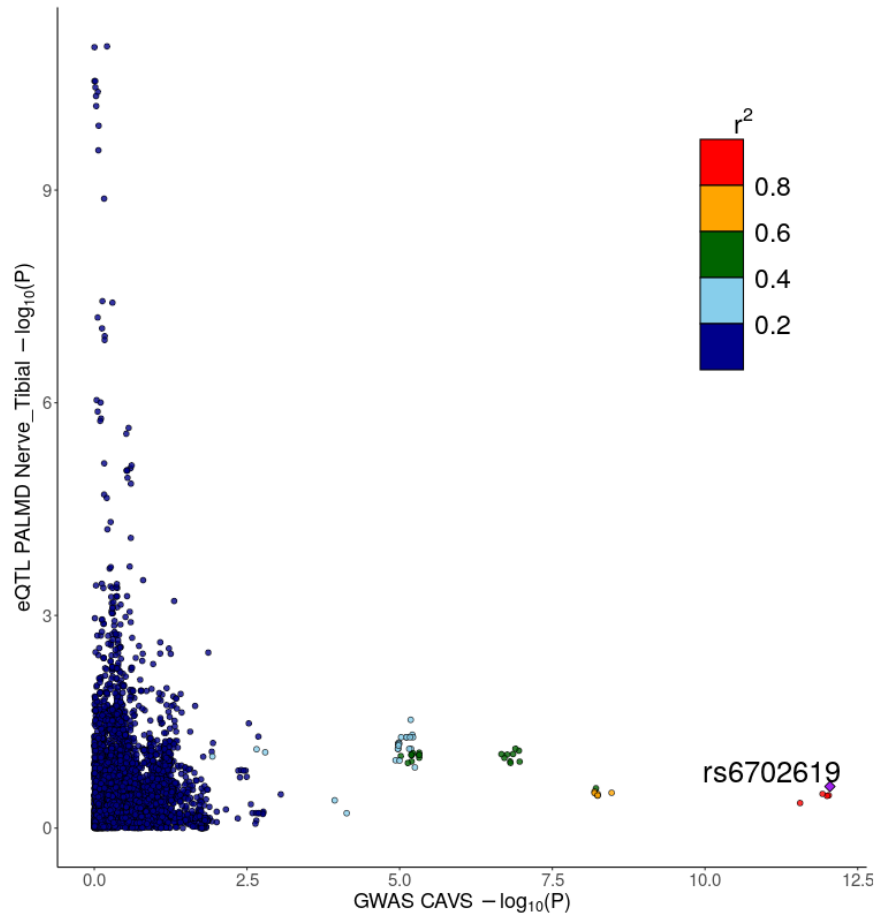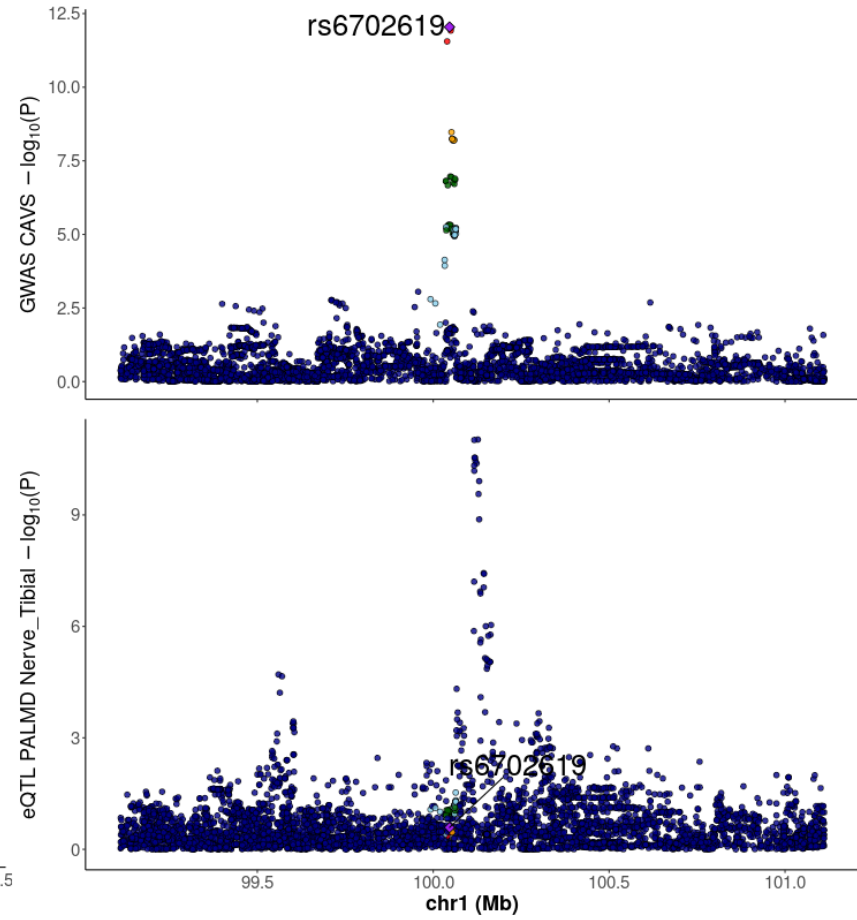

### G) Pancreas

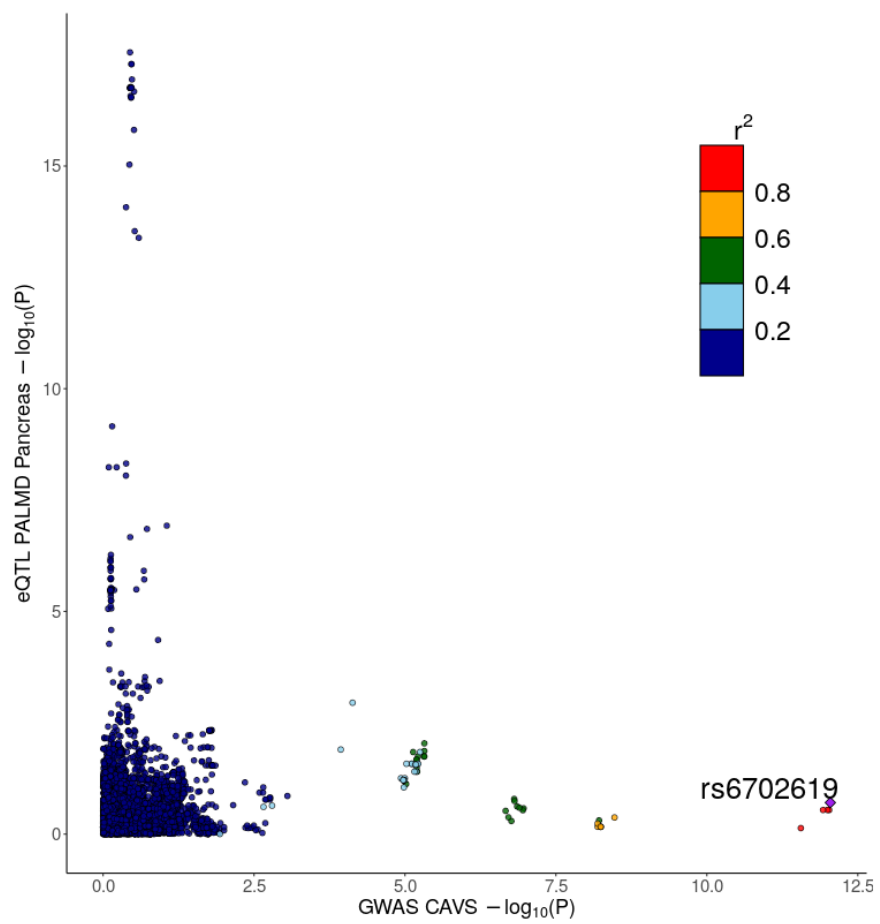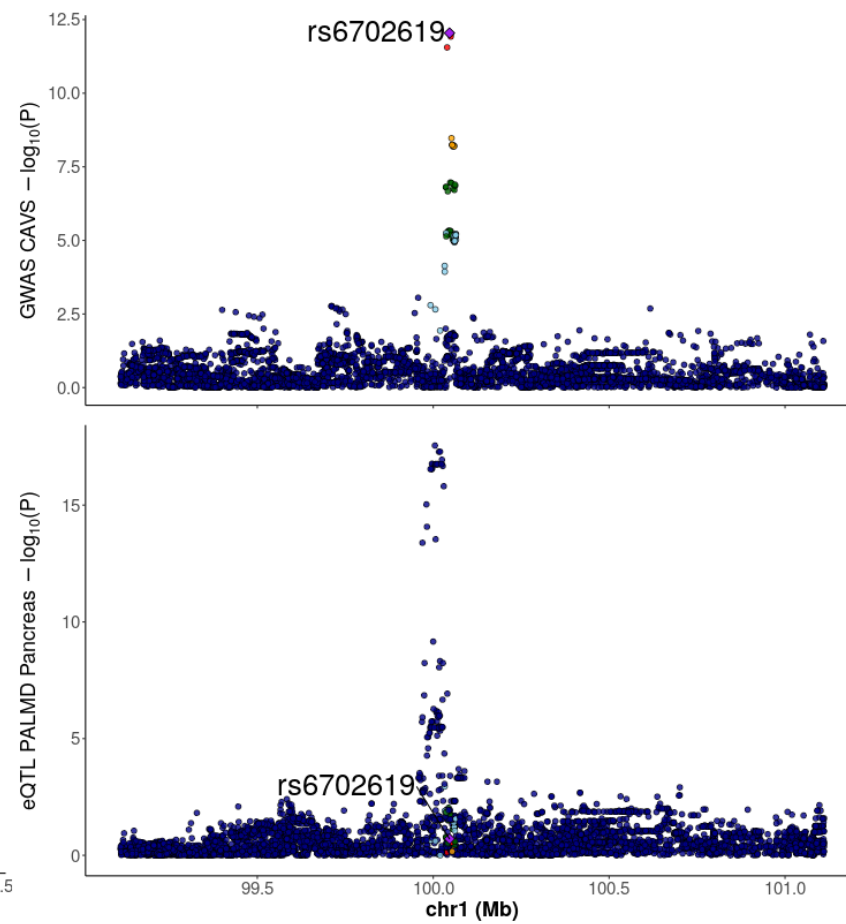

## H) Subcutaneous adipose tissue

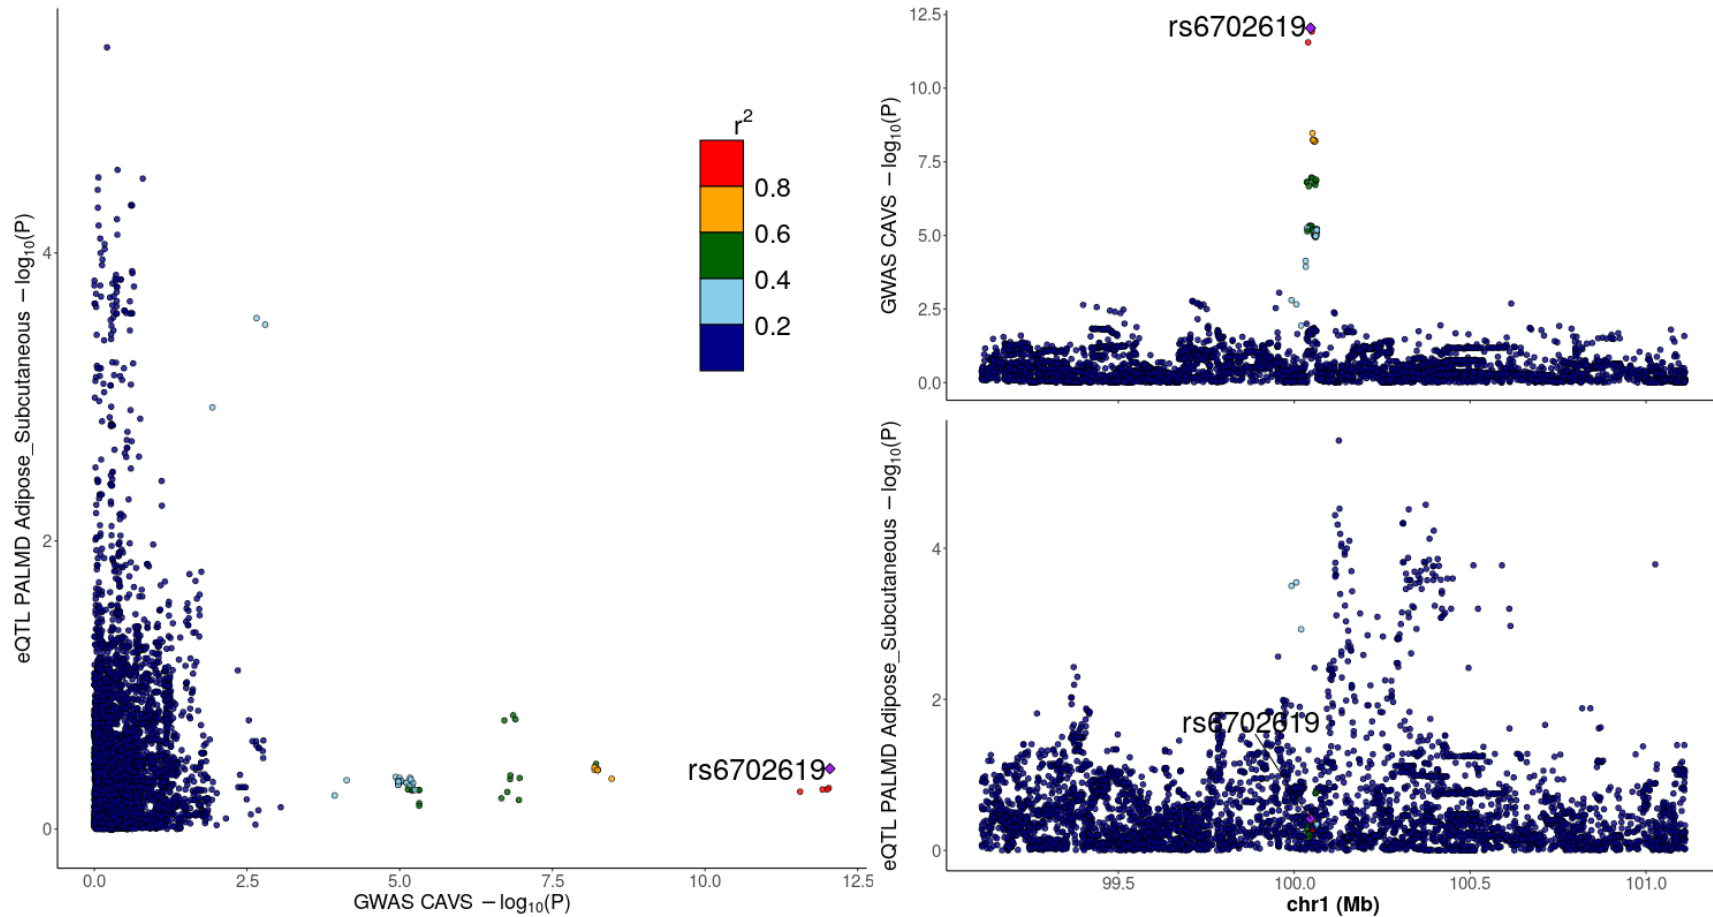

LocusCompare plots<sup>1</sup> showing the relationship between *PALMD* eQTL and GWAS association with CAVS for variants located within 1 Mb of *PALMD*. **A** Brain anterior cingulate cortex, colocalization PP4=3.9%; **B** Transformed fibroblasts, colocalization PP4=1.3%; **C** Gastroesophageal junction, colocalization PP4=2.0%; **D** Esophagus mucosa, colocalization PP4=1.0%; **E** Esophagus muscularis, colocalization PP4=1.1%; **F** Tibial nerve, colocalization PP4=1.0%; **G** Pancreas, colocalization PP4=2.1%; **H** Subcutaneous adipose tissue, colocalization PP4=2.3%. GWAS association was obtained from a meta-analysis of QUEBEC-CAVS and UK Biobank. The lead GWAS variant is annotated.

**Supplementary Figure 4.** Relationship between *PALMD* eQTL in selected tissues and GWAS association with Atrial fibrillation

**A) Aortic valve**

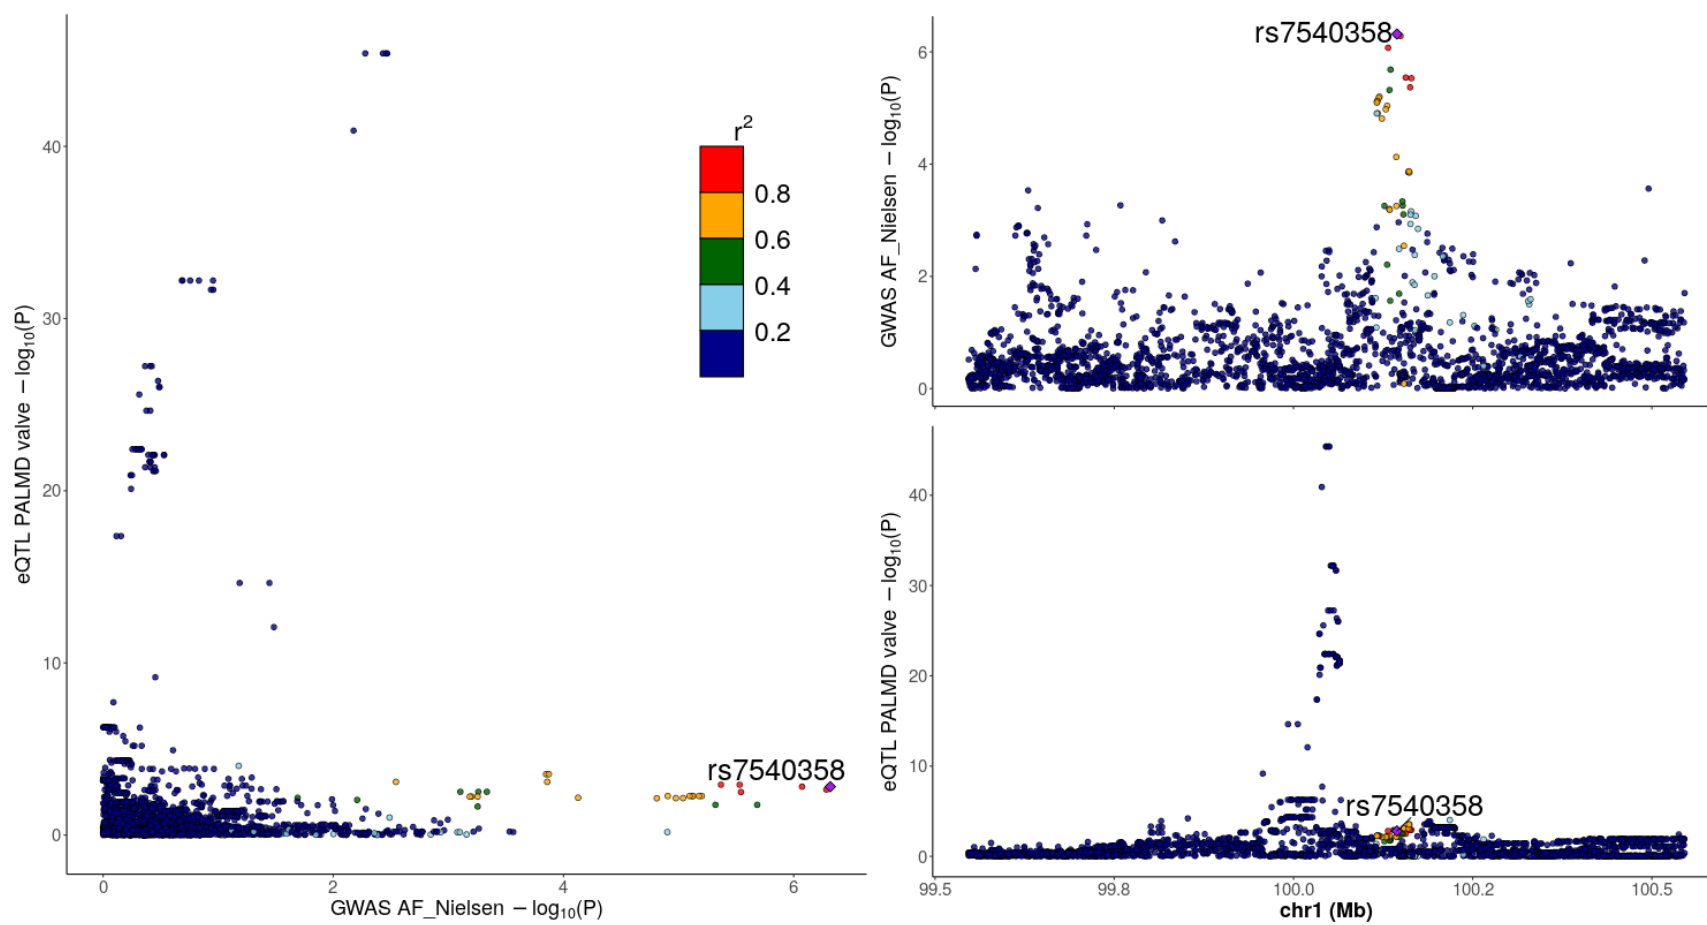

## B) Brain anterior cingulate cortex

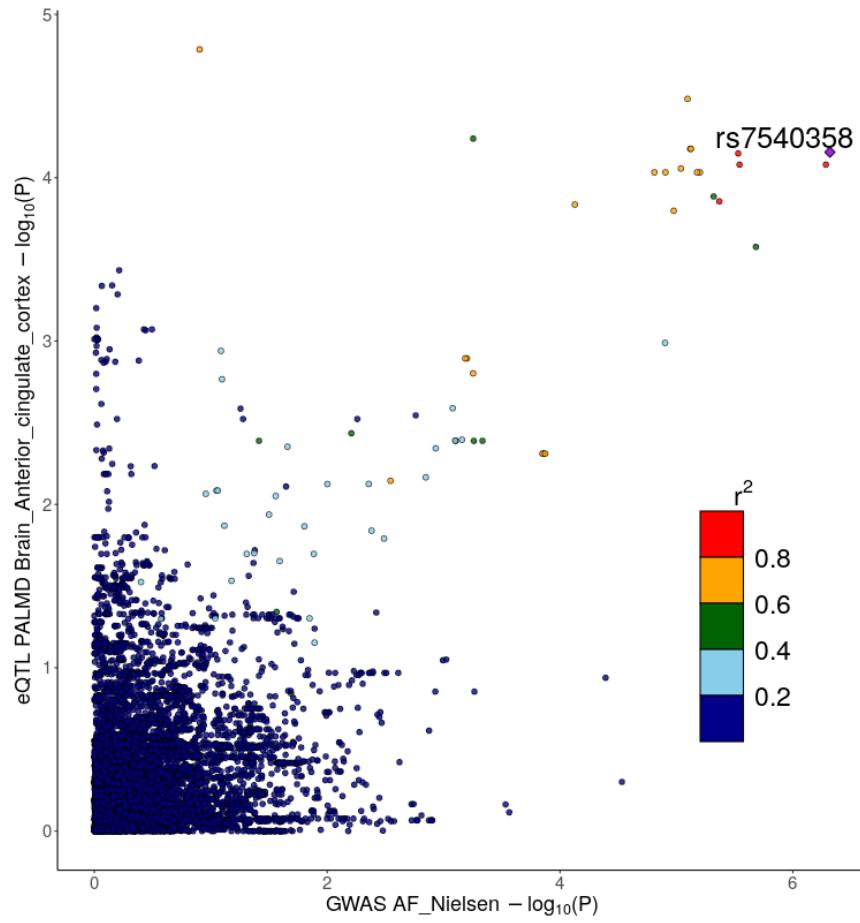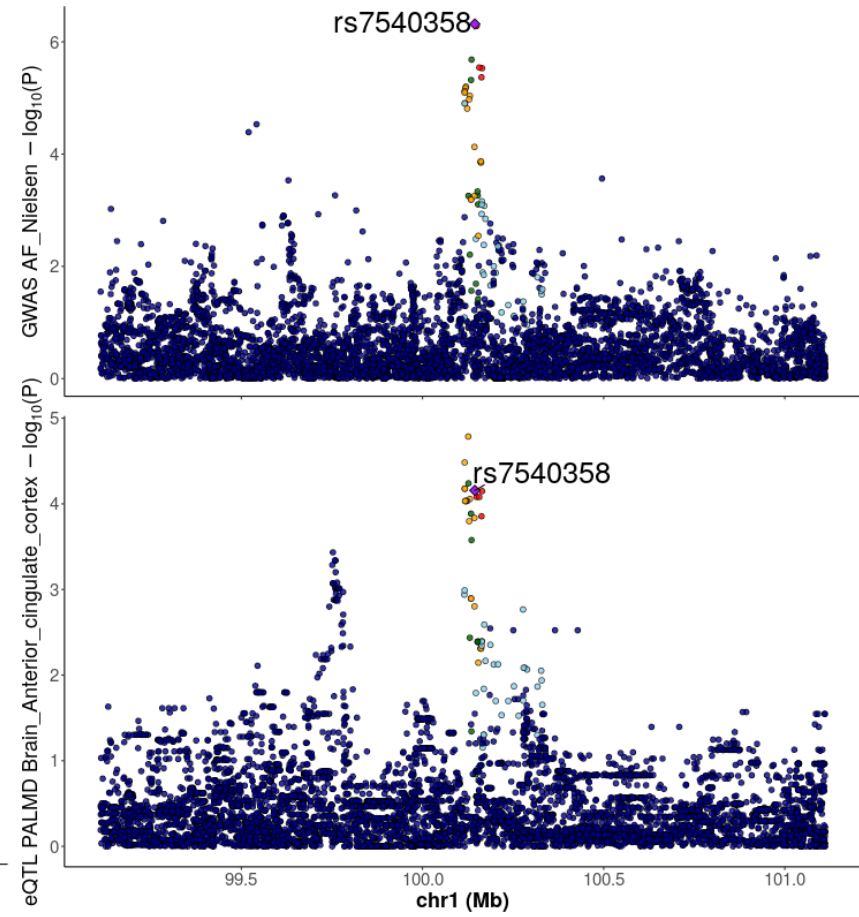

### C) Esophagus muscularis

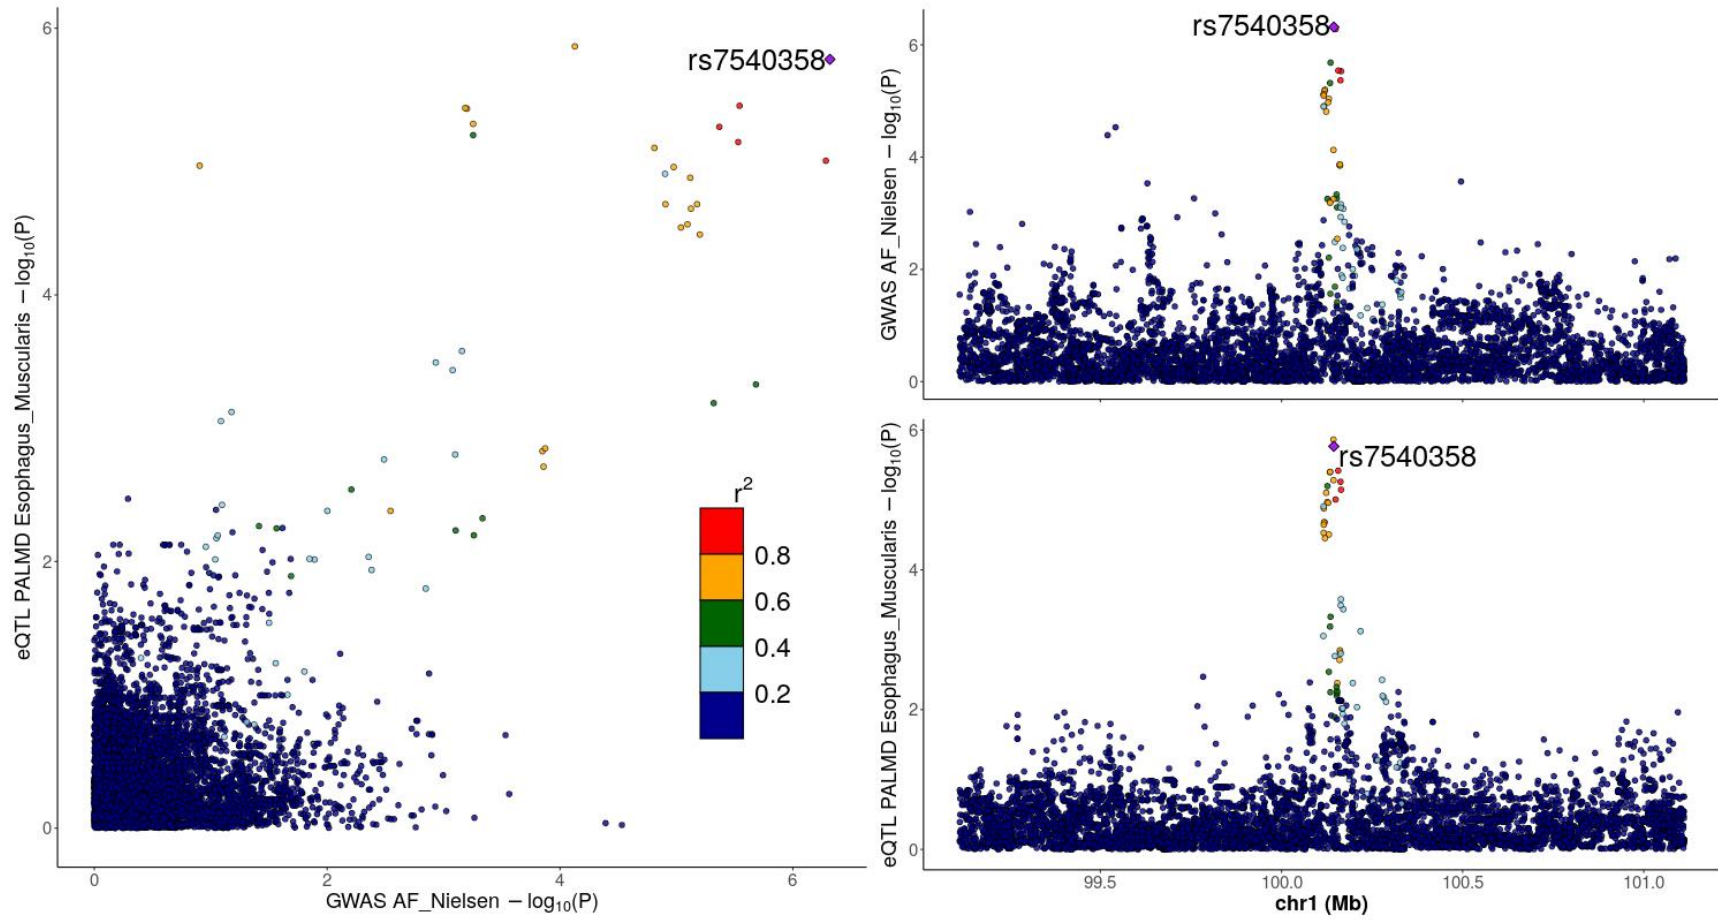

### D) Tibial nerve

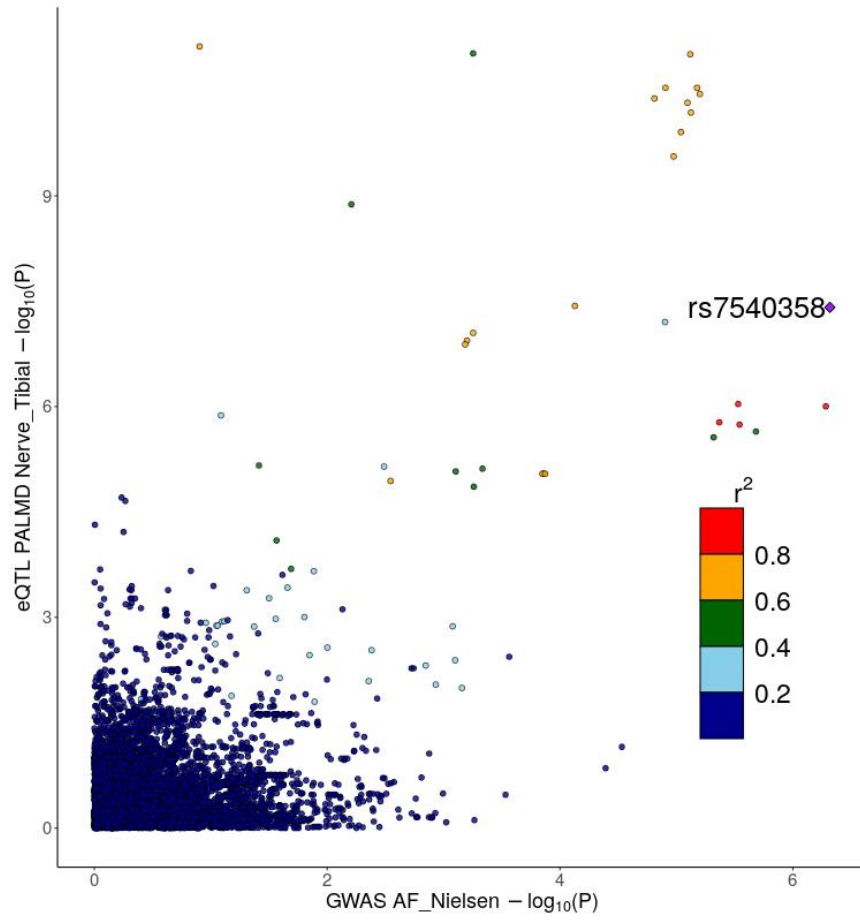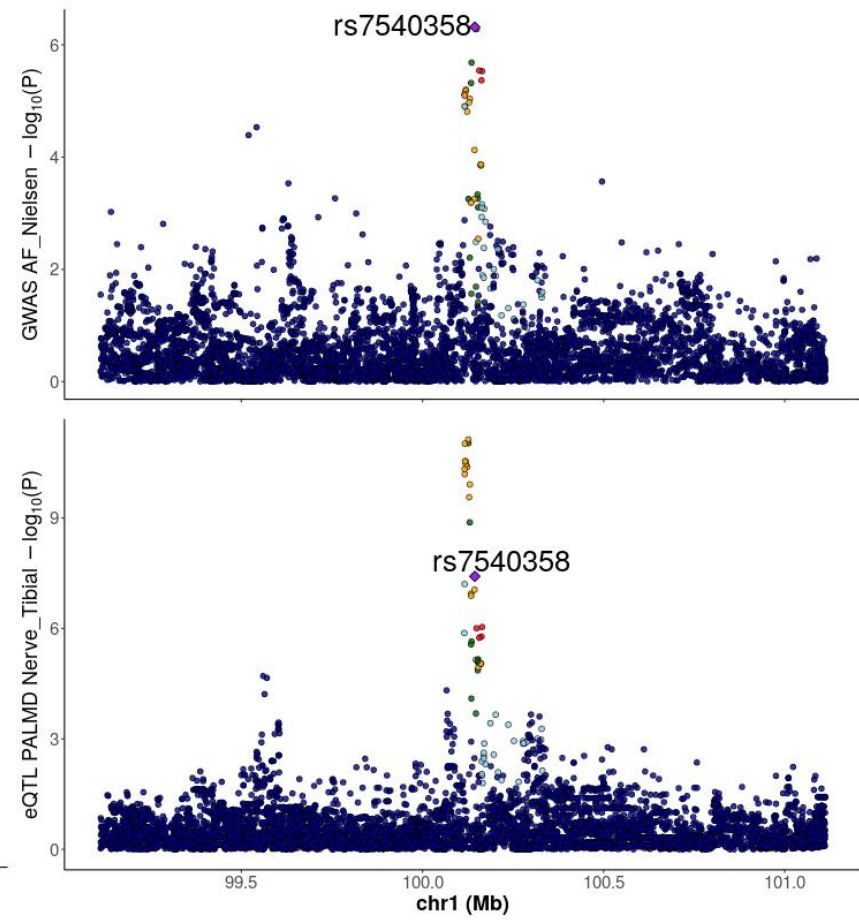



### E) Subcutaneous adipose tissue

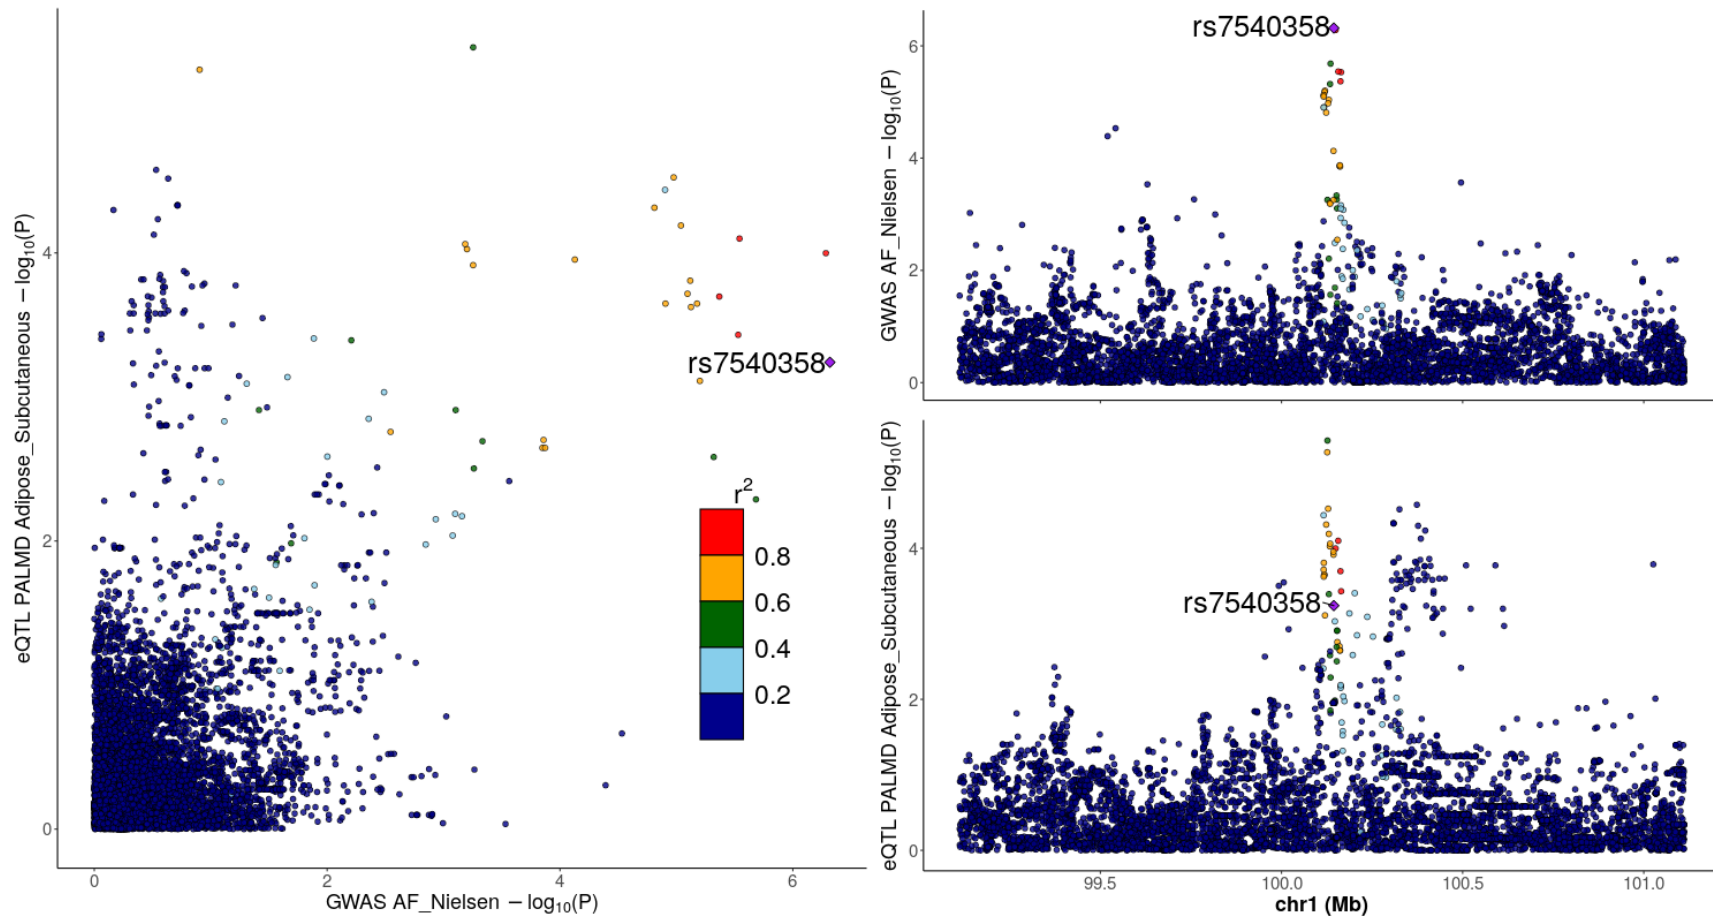

LocusCompare plots<sup>1</sup> showing the relationship between *PALMD* eQTL and GWAS association with Atrial fibrillation for variants located within 1 Mb of *PALMD*. **A** Aortic valve, colocalization PP4=3.2%; **B** Brain anterior cingulate cortex, colocalization PP4=61.4%; **C** Esophagus muscularis, colocalization PP4=97.0%; **D** Tibial nerve, colocalization PP4=88.6%; **E** Subcutaneous adipose tissue, colocalization PP4=77.4%. GWAS association was obtained from Nielsen et al. The lead GWAS variant is annotated.

## Supplementary Tables

**Supplementary Table 1.** Association between *PALMD* genetically-determined expression in the aortic valve and CAVS in the UK Biobank and QUEBEC-CAVS

| <b>Cohort</b> | <b>Sex</b> | <b>N total</b> | <b>N cases</b> | <b>N ctl</b> | <b>OR (95% OR)</b> | <b>P</b> |
|---------------|------------|----------------|----------------|--------------|--------------------|----------|
| UK Biobank    | Women      | 187369         | 451            | 186918       | 0.77 (0.70 - 0.85) | 1.1E-07  |
| UK Biobank    | Men        | 163024         | 899            | 162125       | 0.88 (0.82 - 0.94) | 0.00019  |
| UK Biobank    | All        | 350393         | 1350           | 349043       | 0.84 (0.80 - 0.89) | 9.3E-10  |
| QUEBEC-CAVS   | Women      | 724            | 367            | 357          | 0.75 (0.64 - 0.87) | 0.00022  |
| QUEBEC-CAVS   | Men        | 1302           | 642            | 660          | 0.89 (0.80 - 0.99) | 0.037    |
| QUEBEC-CAVS   | All        | 2026           | 1009           | 1017         | 0.83 (0.76 - 0.91) | 7.4E-05  |
| Meta-analysis | Women      | 188093         | 818            | 187275       | 0.76 (0.70 - 0.83) | 2.2E-10  |
| Meta-analysis | Men        | 164326         | 1541           | 162785       | 0.88 (0.83 - 0.94) | 4.0E-05  |
| Meta-analysis | All        | 352419         | 2359           | 350060       | 0.84 (0.80 - 0.88) | 1.1E-12  |

OR: Odds ratios for CAVS per SD increase in genetically-determined expression of *PALMD* in the aortic valve.

**Supplementary Table 2.** Description of the source of GWAS summary statistics for cardiovascular traits used to evaluate the impact of *PALMD* predicted expression in various tissues

| Trait                                                   | Source                                                                 | Study description                                                                                                                                     | Sample                                                                                        | URL                                                                                                                                                                                             |
|---------------------------------------------------------|------------------------------------------------------------------------|-------------------------------------------------------------------------------------------------------------------------------------------------------|-----------------------------------------------------------------------------------------------|-------------------------------------------------------------------------------------------------------------------------------------------------------------------------------------------------|
| Aortic aneurysm and/or dissection                       | UK Biobank Neale laboratory                                            | UK Biobank, ICD10 code I71                                                                                                                            | 361,194 Europeans, 617 cases and 360,577 controls                                             | <a href="http://www.nealelab.is/uk-biobank">http://www.nealelab.is/uk-biobank</a>                                                                                                               |
| Atrial fibrillation (AF)                                | Nielsen et al. <sup>2</sup>                                            | Meta-analysis of 6 GWAS (HUNT, deCODE, MGI, DiscovEHR, UK Biobank and AFGen)                                                                          | 60,620 AF cases and 970,216 controls in Europeans                                             | <a href="http://csg.sph.umich.edu/willer/public/afib2018/">http://csg.sph.umich.edu/willer/public/afib2018/</a>                                                                                 |
| Blood pressure (DBP, SBP)                               | UK Biobank Neale laboratory                                            | UK Biobank, Automated blood pressure readings, 4079, 4080 fields                                                                                      | 317,756 and 317,754 Europeans                                                                 | <a href="http://www.nealelab.is/uk-biobank">http://www.nealelab.is/uk-biobank</a>                                                                                                               |
| BMI                                                     | Genetic Investigation of Anthropometric Traits (GIANT) <sup>3</sup>    | Meta-analysis of 125 GWAS and Metabochip studies                                                                                                      | 322,154 Europeans                                                                             | <a href="https://www.broadinstitute.org/collaboration/giant/index.php/GIANT_consortium_data_files">https://www.broadinstitute.org/collaboration/giant/index.php/GIANT_consortium_data_files</a> |
| CAVS                                                    | UK Biobank + QUEBEC-CAVS <sup>4</sup>                                  | Meta-analysis of 2 GWAS                                                                                                                               | 2359 CAVS cases and 350,060 controls in Europeans                                             | NA                                                                                                                                                                                              |
| CAD                                                     | CARDIoGRAM <sup>5</sup>                                                | Meta-analysis of 48 GWAS, case status defined as CAD diagnosis (i.e. MI, acute coronary syndrome, chronic stable angina or coronary stenosis of >50%) | 60,801 CAD cases (approximately 70% MI) and 123,504 controls in predominantly Europeans (77%) | <a href="http://www.cardiogramplusc4d.org/">http://www.cardiogramplusc4d.org/</a>                                                                                                               |
| Diabetes, type 2                                        | Diabetes Genetics Replication and Meta-Analysis (DIAGRAM) <sup>6</sup> | Meta-analysis of 12 GWAS, case status defined as T2D diagnosis                                                                                        | 12,171 T2D cases and 56,862 controls in Europeans                                             | <a href="http://diagram-consortium.org/index.html">http://diagram-consortium.org/index.html</a>                                                                                                 |
| Lipids (Total cholesterol, HDL-C, LDL-C, Triglycerides) | Global Lipids Genetics Consortium (GLGC) <sup>7</sup>                  | Meta-analysis of 60 GWAS and Metabochip studies                                                                                                       | 188,577 Europeans                                                                             | <a href="http://lipidgenetics.org/">http://lipidgenetics.org/</a>                                                                                                                               |

|                                   |                                                                   |                                                                                                                            |                                                                                                  |                                                                                                                                                                                                 |
|-----------------------------------|-------------------------------------------------------------------|----------------------------------------------------------------------------------------------------------------------------|--------------------------------------------------------------------------------------------------|-------------------------------------------------------------------------------------------------------------------------------------------------------------------------------------------------|
| Renal function, CKD and eGFR      | CKDGen <sup>8</sup>                                               | Meta-analysis of 43 GWAS; CKD defined as eGFR <sub>crea</sub> < 60 mL/min per 1.73 m <sup>2</sup>                          | 12,385 cases and 104,780 controls in Europeans                                                   | <a href="http://ckdgen.imbi.uni-freiburg.de/">http://ckdgen.imbi.uni-freiburg.de/</a>                                                                                                           |
| Smoking                           | UK Biobank and Tobacco and Genetics (TAG) Consortium <sup>9</sup> | Meta-analysis of UK Biobank and TAG Consortium <sup>10</sup> ; Smoking defined as current or previous smoker (ever smoker) | 518,633 Europeans, 246,715 cases and 271,918 controls                                            | <a href="https://www.thessgac.org/data">https://www.thessgac.org/data</a>                                                                                                                       |
| Stroke, all ischemic and subtypes | MEGASTROKE <sup>11</sup>                                          | Meta-analysis of 29 GWAS                                                                                                   | 34,217 ischemic stroke cases (4,373 LAS; 7,193 CES; 5,386 SVS) and 406,111 controls in Europeans | <a href="http://megastroke.org/">http://megastroke.org/</a>                                                                                                                                     |
| WHR and WHR adjusted for BMI      | GIANT <sup>12</sup>                                               | Meta-analysis of 101 GWAS and metabochip studies                                                                           | 210,088 Europeans                                                                                | <a href="https://www.broadinstitute.org/collaboration/giant/index.php/GIANT_consortium_data_files">https://www.broadinstitute.org/collaboration/giant/index.php/GIANT_consortium_data_files</a> |

## References

- 1 Liu, B., Gloude-mans, M. J., Rao, A. S., Ingelsson, E. & Montgomery, S. B. Abundant associations with gene expression complicate GWAS follow-up. *Nature genetics* **51**, 768-769, doi:10.1038/s41588-019-0404-0 (2019).
- 2 Nielsen, J. B. *et al.* Biobank-driven genomic discovery yields new insight into atrial fibrillation biology. *Nature genetics* **50**, 1234-1239, doi:10.1038/s41588-018-0171-3 (2018).
- 3 Locke, A. E. *et al.* Genetic studies of body mass index yield new insights for obesity biology. *Nature* **518**, 197-206, doi:10.1038/nature14177 (2015).
- 4 Theriault, S. *et al.* A transcriptome-wide association study identifies PALMD as a susceptibility gene for calcific aortic valve stenosis. *Nature communications* **9**, 988, doi:10.1038/s41467-018-03260-6 (2018).
- 5 Nikpay, M. *et al.* A comprehensive 1,000 Genomes-based genome-wide association meta-analysis of coronary artery disease. *Nature genetics* **47**, 1121-1130, doi:10.1038/ng.3396 (2015).
- 6 Morris, A. P. *et al.* Large-scale association analysis provides insights into the genetic architecture and pathophysiology of type 2 diabetes. *Nature genetics* **44**, 981-990, doi:10.1038/ng.2383 (2012).
- 7 Willer, C. J. *et al.* Discovery and refinement of loci associated with lipid levels. *Nature genetics* **45**, 1274-1283, doi:10.1038/ng.2797 (2013).
- 8 Pattaro, C. *et al.* Genetic associations at 53 loci highlight cell types and biological pathways relevant for kidney function. *Nature communications* **7**, 10023, doi:10.1038/ncomms10023 (2016).
- 9 Karlsson Linnér, R. *et al.* Genome-wide association analyses of risk tolerance and risky behaviors in over 1 million individuals identify hundreds of loci and shared genetic influences. *Nature genetics* **51**, 245-257, doi:10.1038/s41588-018-0309-3 (2019).
- 10 Genome-wide meta-analyses identify multiple loci associated with smoking behavior. *Nature genetics* **42**, 441-447, doi:10.1038/ng.571 (2010).
- 11 Malik, R. *et al.* Multi-ancestry genome-wide association study of 520,000 subjects identifies 32 loci associated with stroke and stroke subtypes. *Nature genetics* **50**, 524-537, doi:10.1038/s41588-018-0058-3 (2018).
- 12 Shungin, D. *et al.* New genetic loci link adipose and insulin biology to body fat distribution. *Nature* **518**, 187-196, doi:10.1038/nature14132 (2015).
