# Supplementary material for: Phenome-wide analyses establish a specific association between aortic valve PALMD expression and calcific aortic valve stenosis
Source: PubMed Central journal article supplement (PMC7455695; doi:10.1038/s42003-020-01210-x), 2020-08-28
Supplement: 42003_2020_1210_MOESM2_ESM.pdf [file 42003_2020_1210_MOESM2_ESM.pdf]

## Description of Additional Supplementary Files

**Supplementary Data 1. Variants in the models used to predict *PALMD* expression in 9 tissues.** Table listing the variants and their weights in models used to predict *PALMD* expression in 9 tissues. Chr: Chromosome; Pos: Position (GRCh37).

**Supplementary Data 2. Description of the 852 phenotypes used in the phenome-wide analyses in the UK Biobank.** ICD: International Classification of Diseases 10th Revision; Clinical: phenotypes obtained from participants visits (questionnaire or examination); OPCS: Office of Population Censuses and Surveys Classification of Surgical Operations and Procedures, 4th Revision.

**Supplementary Data 3. Results of the Phenome-wide association study for *PALMD* genetically-determined expression in the aortic valve.**  $P_{FDR}$ : p-value adjusted using false discovery rate (Benjamini & Hochberg) method;  $P_{BY}$ : p-value adjusted using Benjamini & Yekutieli method;  $P_{Bonf}$ : p-value adjusted using Bonferroni correction; ICD: International Classification of Diseases 10th Revision; Clinical: phenotypes obtained from participants visits (questionnaire or examination); OPCS: Office of Population Censuses and Surveys Classification of Surgical Operations and Procedures, 4th Revision; NCI: non-cancer illness code (self-reported).

**Supplementary Data 4. Results of the Phenome-wide association study for rs6702619-G.**  $P_{FDR}$ : p-value adjusted using false discovery rate (Benjamini & Hochberg) method;  $P_{BY}$ : p-value adjusted using Benjamini & Yekutieli method;  $P_{Bonf}$ : p-value adjusted using Bonferroni correction; ICD: International Classification of Diseases 10th Revision; Clinical: phenotypes obtained from participants visits (questionnaire or examination); OPCS: Office of Population Censuses and Surveys Classification of Surgical Operations and Procedures, 4th Revision; NCI: non-cancer illness code (self-reported).

**Supplementary Data 5. eQTL with  $P < 0.001$  for rs6702619-G in 49 tissues (cis and trans).** Table showing all eQTL with  $P < 0.001$  for the G allele at rs6702619 in the aortic valve and 48 other tissues, including cis and trans results. Distance: distance between rs6702619 and the transcription start site of the gene (number of bases);  $P_{FDR}$ : p-value adjusted using false discovery rate (Benjamini & Hochberg) method;  $P_{BY}$ : p-value adjusted using Benjamini & Yekutieli method;  $P_{Bonf}$ : p-value adjusted using Bonferroni correction;

**Supplementary Data 6. Results of the Phenome-wide association study for *PALMD* genetically-determined expression in brain anterior cingulate cortex.**  $P_{FDR}$ : p-value adjusted using false discovery rate (Benjamini & Hochberg) method;  $P_{BY}$ : p-value adjusted using Benjamini & Yekutieli method;  $P_{Bonf}$ : p-value adjusted using Bonferroni correction; ICD: International Classification of Diseases 10th Revision; Clinical: phenotypes obtained from participants visits (questionnaire or examination); OPCS: Office of Population Censuses and

Surveys Classification of Surgical Operations and Procedures, 4th Revision; NCI: non-cancer illness code (self-reported).

**Supplementary Data 7. Results of the Phenome-wide association study for *PALMD* genetically-determined expression in transformed fibroblasts.**  $P_{FDR}$ : p-value adjusted using false discovery rate (Benjamini & Hochberg) method;  $P_{BY}$ : p-value adjusted using Benjamini & Yekutieli method;  $P_{Bonf}$ : p-value adjusted using Bonferroni correction; ICD: International Classification of Diseases 10th Revision; Clinical: phenotypes obtained from participants visits (questionnaire or examination); OPCS: Office of Population Censuses and Surveys Classification of Surgical Operations and Procedures, 4th Revision; NCI: non-cancer illness code (self-reported).

**Supplementary Data 8. Results of the Phenome-wide association study for *PALMD* genetically-determined expression in gastroesophageal junction.**  $P_{FDR}$ : p-value adjusted using false discovery rate (Benjamini & Hochberg) method;  $P_{BY}$ : p-value adjusted using Benjamini & Yekutieli method;  $P_{Bonf}$ : p-value adjusted using Bonferroni correction; ICD: International Classification of Diseases 10th Revision; Clinical: phenotypes obtained from participants visits (questionnaire or examination); OPCS: Office of Population Censuses and Surveys Classification of Surgical Operations and Procedures, 4th Revision; NCI: non-cancer illness code (self-reported).

**Supplementary Data 9. Results of the Phenome-wide association study for *PALMD* genetically-determined expression in esophagus mucosa.**  $P_{FDR}$ : p-value adjusted using false discovery rate (Benjamini & Hochberg) method;  $P_{BY}$ : p-value adjusted using Benjamini & Yekutieli method;  $P_{Bonf}$ : p-value adjusted using Bonferroni correction; ICD: International Classification of Diseases 10th Revision; Clinical: phenotypes obtained from participants visits (questionnaire or examination); OPCS: Office of Population Censuses and Surveys Classification of Surgical Operations and Procedures, 4th Revision; NCI: non-cancer illness code (self-reported).

**Supplementary Data 10. Results of the Phenome-wide association study for *PALMD* genetically-determined expression in esophagus muscularis.**  $P_{FDR}$ : p-value adjusted using false discovery rate (Benjamini & Hochberg) method;  $P_{BY}$ : p-value adjusted using Benjamini & Yekutieli method;  $P_{Bonf}$ : p-value adjusted using Bonferroni correction; ICD: International Classification of Diseases 10th Revision; Clinical: phenotypes obtained from participants visits (questionnaire or examination); OPCS: Office of Population Censuses and Surveys Classification of Surgical Operations and Procedures, 4th Revision; NCI: non-cancer illness code (self-reported).

**Supplementary Data 11. Results of the Phenome-wide association study for *PALMD* genetically-determined expression in tibial nerve.**  $P_{FDR}$ : p-value adjusted using false discovery rate (Benjamini & Hochberg) method;  $P_{BY}$ : p-value adjusted using Benjamini & Yekutieli method;  $P_{Bonf}$ : p-value adjusted using Bonferroni correction; ICD: International Classification of Diseases 10th Revision; Clinical: phenotypes obtained from participants visits (questionnaire or examination); OPCS: Office of Population Censuses and Surveys Classification of Surgical Operations and Procedures, 4th Revision; NCI: non-cancer illness code (self-reported).

**Supplementary Data 12. Results of the Phenome-wide association study for *PALMD* genetically-determined expression in pancreas.** *P*\_FDR: p-value adjusted using false discovery rate (Benjamini & Hochberg) method; *P*\_BY: p-value adjusted using Benjamini & Yekutieli method; *P*\_Bonf: p-value adjusted using Bonferroni correction; ICD: International Classification of Diseases 10th Revision; Clinical: phenotypes obtained from participants visits (questionnaire or examination); OPCS: Office of Population Censuses and Surveys Classification of Surgical Operations and Procedures, 4th Revision; NCI: non-cancer illness code (self-reported).

**Supplementary Data 13. Results of the Phenome-wide association study for *PALMD* genetically-determined expression in subcutaneous adipose tissue.** *P*\_FDR: p-value adjusted using false discovery rate (Benjamini & Hochberg) method; *P*\_BY: p-value adjusted using Benjamini & Yekutieli method; *P*\_Bonf: p-value adjusted using Bonferroni correction; ICD: International Classification of Diseases 10th Revision; Clinical: phenotypes obtained from participants visits (questionnaire or examination); OPCS: Office of Population Censuses and Surveys Classification of Surgical Operations and Procedures, 4th Revision; NCI: non-cancer illness code (self-reported).

**Supplementary Data 14. Association between *PALMD* genetically-determined expression in 9 tissues and 21 cardiovascular phenotypes using S-PrediXcan.** Source: GWAS meta-analysis used as described in **Supplementary Table 2**; *P*\_FDR: p-value adjusted using false discovery rate (Benjamini & Hochberg) method; *P*\_BY: p-value adjusted using Benjamini & Yekutieli method; *P*\_Bonf: p-value adjusted using Bonferroni correction.
